# Supplementary material
Source: publisher figshare collection journal article supplement (https://acs.figshare.com/ndownloader/files/5851797)

## Supporting Information

### ***p*-Terphenyl derivatives from the endolichenic fungus *Floricola striata***

Wei Li <sup>†</sup>, Wei Gao <sup>‡</sup>, Ming Zhang <sup>†</sup>, Yue-Lan Li <sup>†</sup>, Lin Li <sup>†</sup>, Xiao-Bin Li <sup>†</sup>, Wen-Qiang Chang <sup>†</sup>, Zun-Tian Zhao <sup>‡,\*</sup> and Hong-Xiang Lou <sup>†,\*</sup>

<sup>†</sup> Department of Natural Products Chemistry, Key Lab of Chemical Biology of Ministry of Education, School of Pharmaceutical Sciences, Shandong University, Jinan 250012, China

<sup>‡</sup> College of Life Sciences, Shandong Normal University, No. 88 East Wenhua Road, Jinan 250014, China

To whom correspondence should be addressed. \*Fax: +86-531-8838-2019 (Hong-Xiang Lou); +86-531-8618-0749 (Zun-Tian Zhao).  
E-mail: [louhongxiang@sdu.edu.cn](mailto:louhongxiang@sdu.edu.cn) (Hong-Xiang Lou); ztzhao@sohu.com (Zun-Tian Zhao).

## Table of Content

### For compound 1:

- S1.  $^1\text{H}$  NMR spectrum (400 MHz) of 1 in acetone- $d_6$
- S2.  $^{13}\text{C}$  NMR spectrum (100 MHz) of 1 in acetone- $d_6$
- S3.  $^1\text{H}$ - $^1\text{H}$  COSY spectrum of 1 in acetone- $d_6$
- S4. HSQC spectrum of 1 in acetone- $d_6$
- S5. HMBC spectrum of 1 in acetone- $d_6$
- S6. HRESIMS Spectrum of Compound 1
- S7. IR Spectrum of Compound 1

### For compound 2:

- S8.  $^1\text{H}$  NMR spectrum (400 MHz) of 2 in  $\text{CDCl}_3$
- S9.  $^{13}\text{C}$  NMR spectrum (100 MHz) of 2 in  $\text{CDCl}_3$
- S10.  $^1\text{H}$ - $^1\text{H}$  COSY spectrum of 2 in  $\text{CDCl}_3$
- S11. HSQC spectrum of 2 in  $\text{CDCl}_3$
- S12. HMBC spectrum of 2 in  $\text{CDCl}_3$
- S13. HRESIMS Spectrum of Compound 2
- S14. IR Spectrum of Compound 2

### For compound 3:

- S15.  $^1\text{H}$  NMR spectrum (400 MHz) of 3 in  $\text{CDCl}_3$
- S16.  $^{13}\text{C}$  NMR spectrum (100 MHz) of 3 in  $\text{CDCl}_3$
- S17.  $^1\text{H}$ - $^1\text{H}$  COSY spectrum of 3 in  $\text{CDCl}_3$
- S18. HSQC spectrum of 3 in  $\text{CDCl}_3$
- S19. HMBC spectrum of 3 in  $\text{CDCl}_3$
- S20. HRESIMS Spectrum of Compound 3
- S21. IR Spectrum of Compound 3

### For compound 4:

- S22.  $^1\text{H}$  NMR spectrum (400 MHz) of 4 in  $\text{CD}_3\text{OD}$
- S23.  $^{13}\text{C}$  NMR spectrum (100 MHz) of 4 in  $\text{CD}_3\text{OD}$
- S24.  $^1\text{H}$ - $^1\text{H}$  COSY spectrum of 4 in  $\text{CD}_3\text{OD}$
- S25. HSQC spectrum of 4 in  $\text{CD}_3\text{OD}$

**S26. HMBC spectrum of 4 in CD<sub>3</sub>OD**

**S27. HRESIMS Spectrum of Compound 4**

**S28. IR Spectrum of Compound 4**

**For compound 5:**

**S29. <sup>1</sup>H NMR spectrum (600 MHz) of 5 in CD<sub>3</sub>OD**

**S30. <sup>13</sup>C NMR spectrum (150 MHz) of 5 in CD<sub>3</sub>OD**

**S31. <sup>1</sup>H-<sup>1</sup>H COSY spectrum of 5 in CD<sub>3</sub>OD**

**S32. HSQC spectrum of 5 in CD<sub>3</sub>OD**

**S33. HMBC spectrum of 5 in CD<sub>3</sub>OD**

**S34. HRESIMS Spectrum of Compound 5**

**S35. IR Spectrum of Compound 5**

**For compound 6:**

**S36. <sup>1</sup>H NMR spectrum (600 MHz) of 6 in acetone-*d*<sub>6</sub>**

**S37. <sup>13</sup>C NMR spectrum (150 MHz) of 6 in acetone-*d*<sub>6</sub>**

**S38. <sup>1</sup>H-<sup>1</sup>H COSY spectrum of 6 in acetone-*d*<sub>6</sub>**

**S39. HSQC spectrum of 6 in acetone-*d*<sub>6</sub>**

**S40. HMBC spectrum of 6 in acetone-*d*<sub>6</sub>**

**S41. HRESIMS Spectrum of Compound 6**

**S42. IR Spectrum of Compound 6**

**For compound 7:**

**S43. <sup>1</sup>H NMR spectrum (400 MHz) of 7 in CDCl<sub>3</sub>**

**S44. <sup>13</sup>C NMR spectrum (100 MHz) of 7 in CDCl<sub>3</sub>**

**S45. <sup>1</sup>H-<sup>1</sup>H COSY spectrum of 7 in CDCl<sub>3</sub>**

**S46. HSQC spectrum of 7 in CDCl<sub>3</sub>**

**S47. HMBC spectrum of 7 in CDCl<sub>3</sub>**

**S48. HRESIMS Spectrum of Compound 7**

**S49. IR Spectrum of Compound 7**

**For compound 8:**

**S50. <sup>1</sup>H NMR spectrum (600 MHz) of 8 in CD<sub>3</sub>OD**

**S51. <sup>13</sup>C NMR spectrum (150 MHz) of 8 in CD<sub>3</sub>OD**

**S52.  $^1\text{H}$ - $^1\text{H}$  COSY spectrum of 8 in  $\text{CD}_3\text{OD}$**

**S53. HSQC spectrum of 8 in  $\text{CD}_3\text{OD}$**

**S54. HMBC spectrum of 8 in  $\text{CD}_3\text{OD}$**

**S55. HRESIMS Spectrum of Compound 8**

**S56. IR Spectrum of Compound 8**

**For compound 9:**

**S57.  $^1\text{H}$  NMR spectrum (400 MHz) of 9a and 9b in acetone- $d_6$**

**S58.  $^{13}\text{C}$  NMR spectrum (100 MHz) of 9a and 9b in acetone- $d_6$**

**S59.  $^1\text{H}$ - $^1\text{H}$  COSY spectrum of 9a and 9b in acetone- $d_6$**

**S60. HSQC spectrum of 9a and 9b in acetone- $d_6$**

**S61. HMBC spectrum of 9a and 9b in acetone- $d_6$**

**S62. HRESIMS Spectrum of Compound 9a and 9b**

**S63. IR Spectrum of Compound 9a and 9b**

**S64. Chromatogram of 9 using chiral HPLC-CD spectroscopy**

**S65. UV Spectrum of Compound 9a and 9b**

**For compound 10:**

**S66.  $^1\text{H}$  NMR spectrum (600 MHz) of 10a and 10b in acetone- $d_6$**

**S67.  $^{13}\text{C}$  NMR spectrum (150 MHz) of 10a and 10b in acetone- $d_6$**

**S68.  $^1\text{H}$ - $^1\text{H}$  COSY spectrum of 10a and 10b in acetone- $d_6$**

**S69. HSQC spectrum of 10a and 10b in acetone- $d_6$**

**S70. HMBC spectrum of 10a and 10b in acetone- $d_6$**

**S71. HRESIMS Spectrum of Compound 10a and 10b**

**S72. IR Spectrum of Compound 10a and 10b**

**S73. HPLC separation chromatogram of 10 on chiral column**

**S74. UV Spectrum of Compound 10a and 10b**

**S1.  $^1\text{H}$  NMR spectrum (400 MHz) of 1 in acetone- $d_6$**

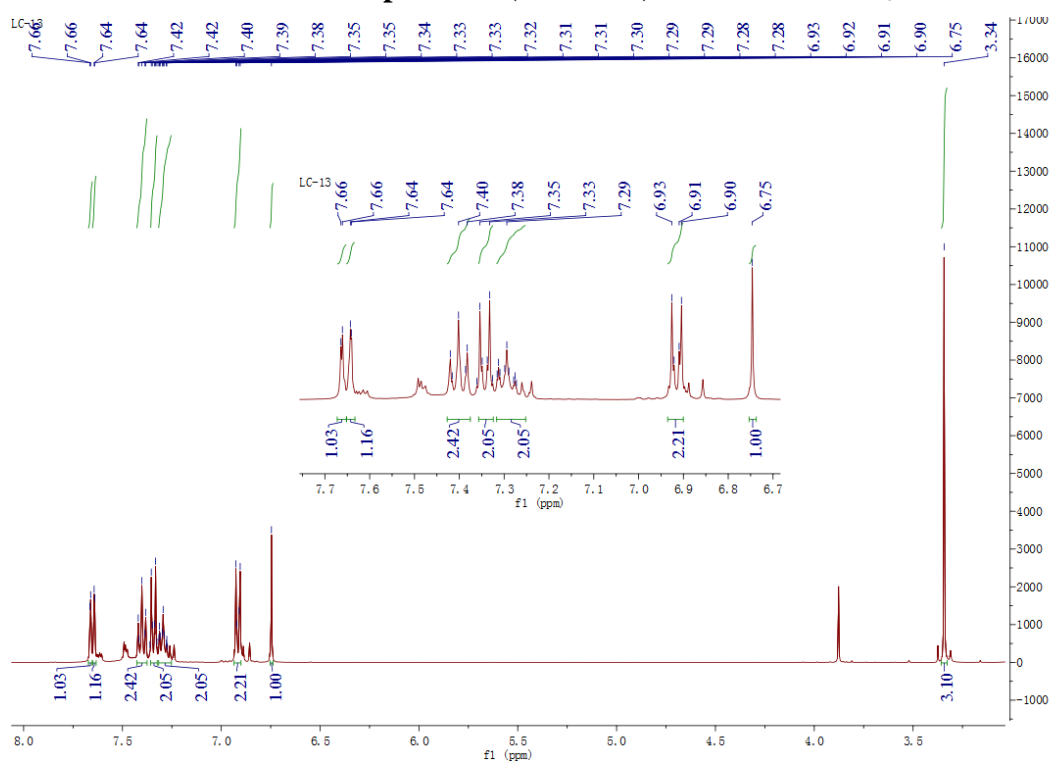

**S2.  $^{13}\text{C}$  NMR spectrum (100 MHz) of 1 in acetone- $d_6$**

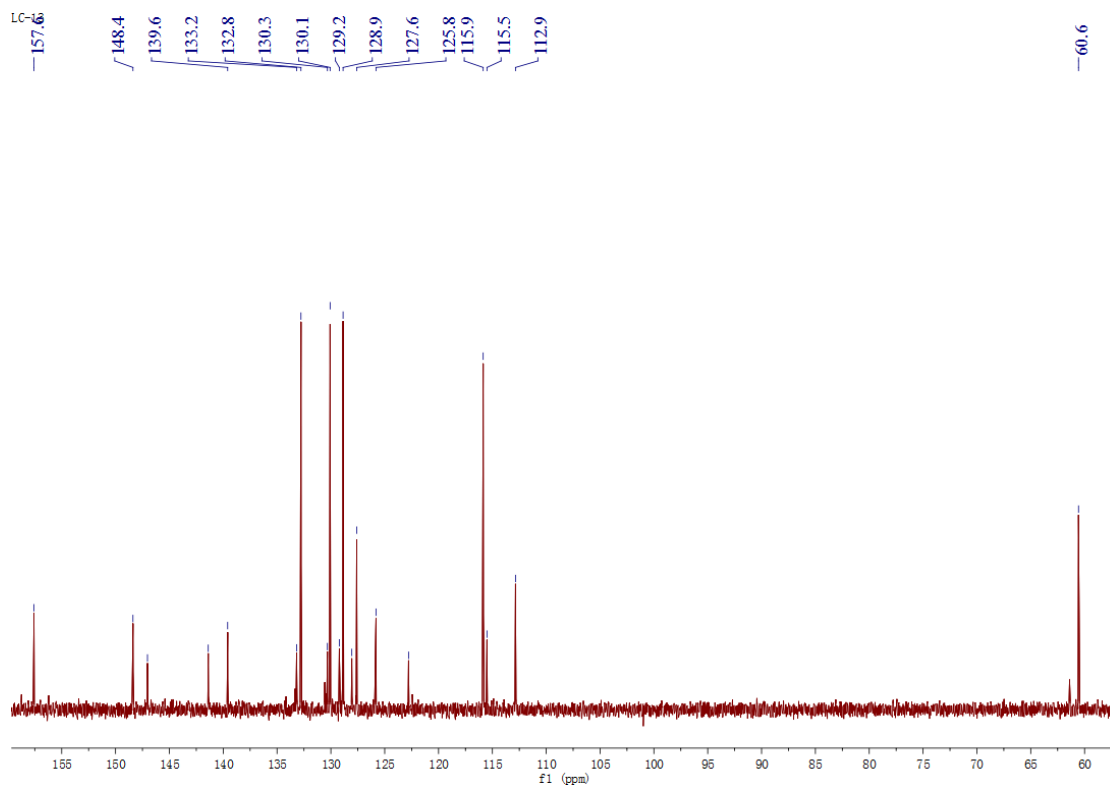

**S3.  $^1\text{H}$ - $^1\text{H}$  COSY spectrum of 1 in acetone- $d_6$**

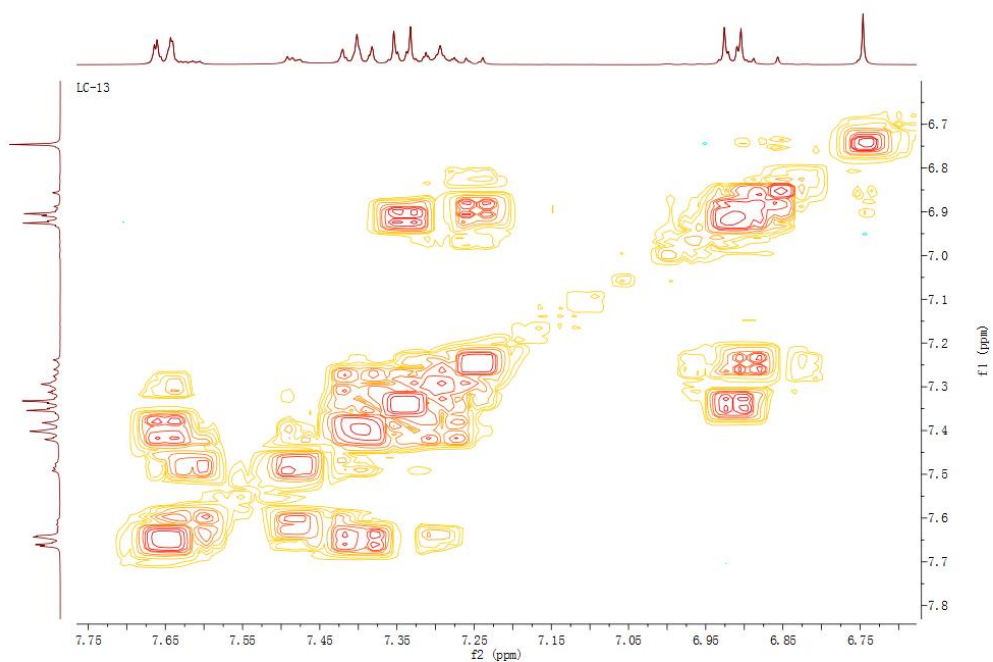

**S4. HSQC spectrum of 1 in acetone- $d_6$**

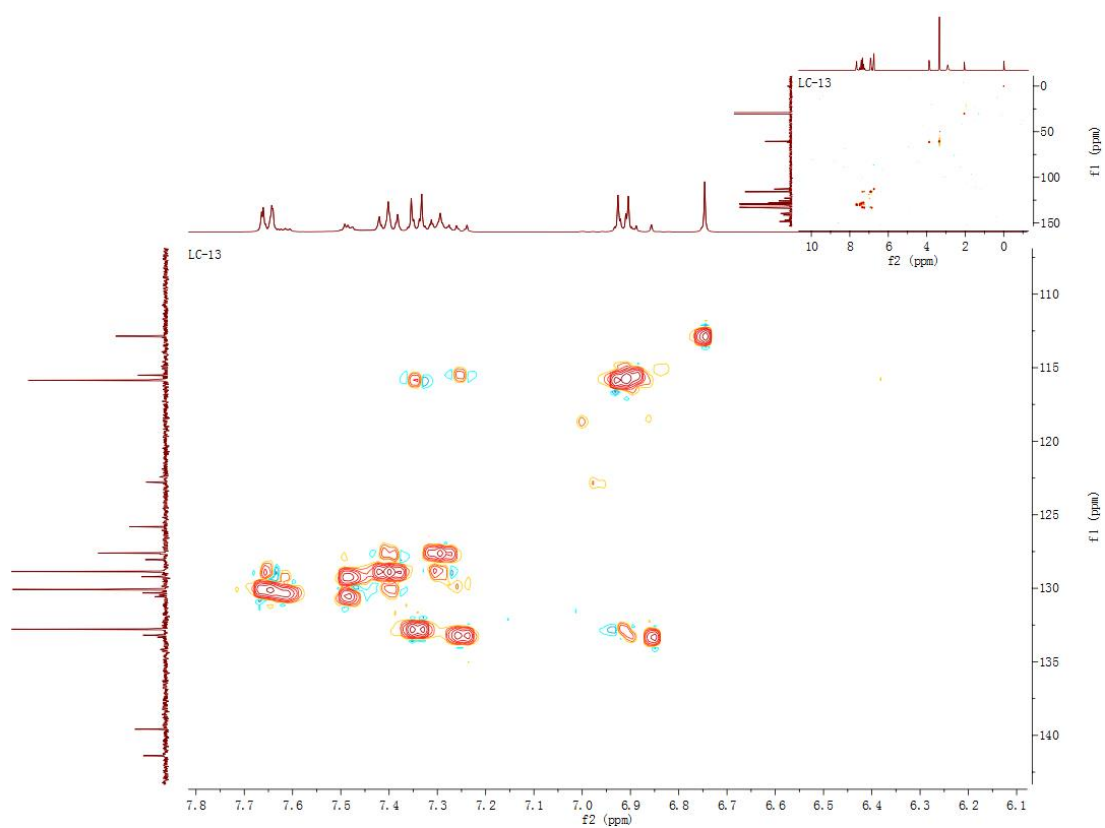

## S5. HMBC spectrum of 1 in acetone- $d_6$

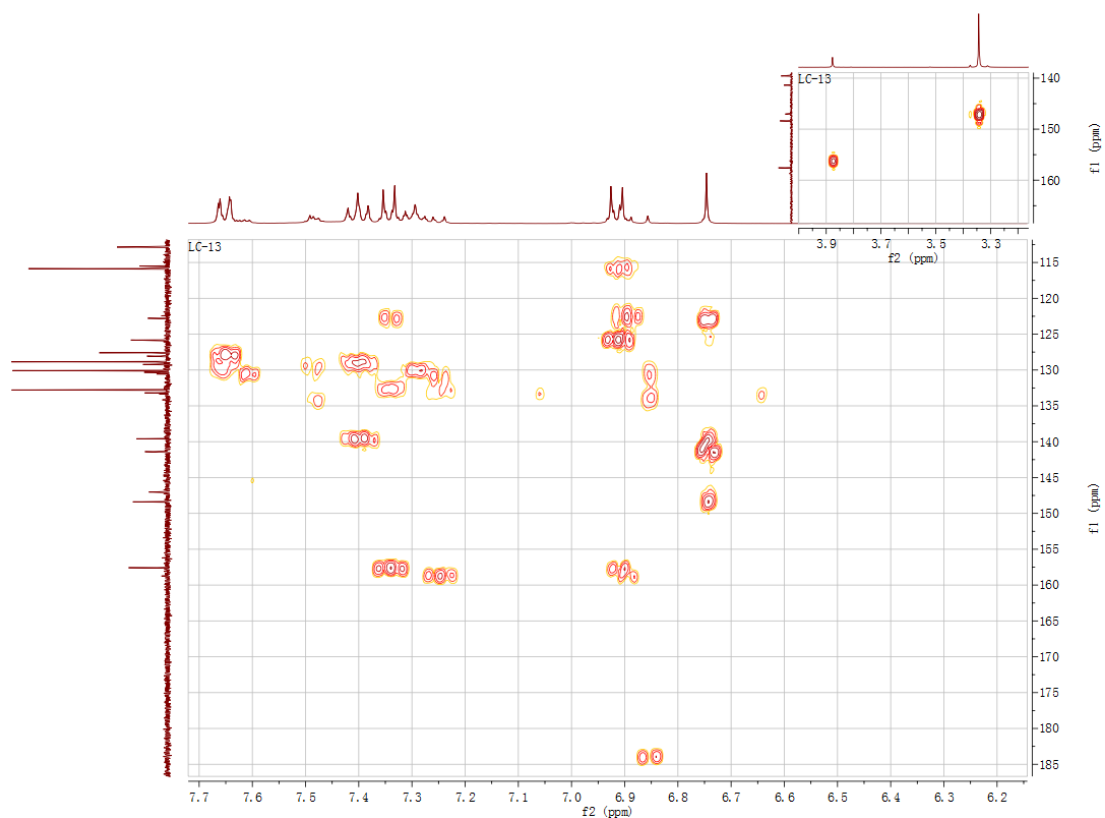

## S6. HRESIMS Spectrum of Compound 1

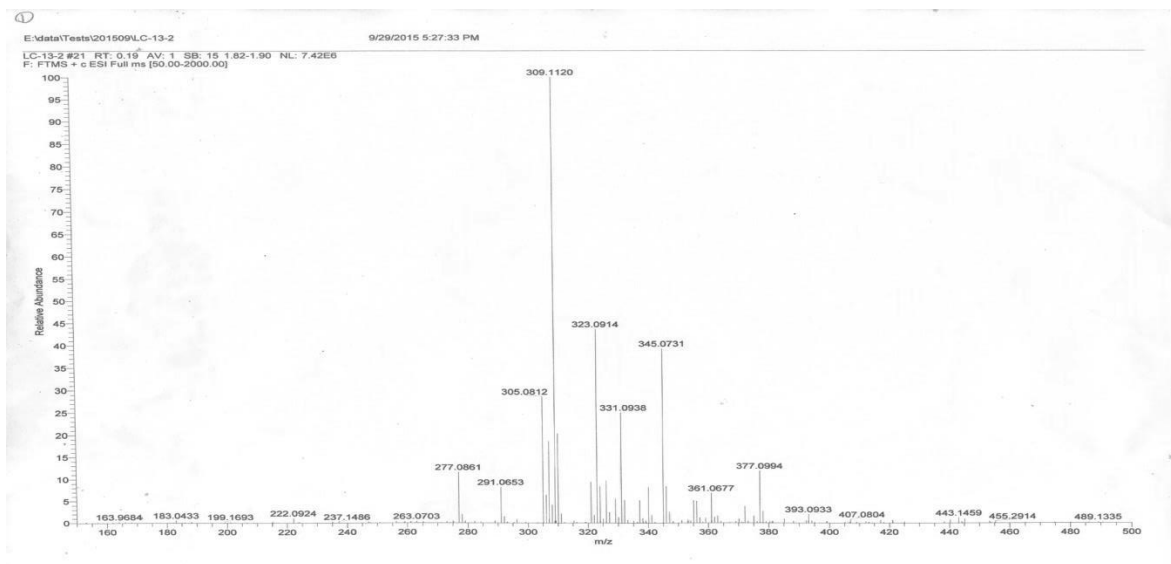

## S7. IR Spectrum of Compound 1

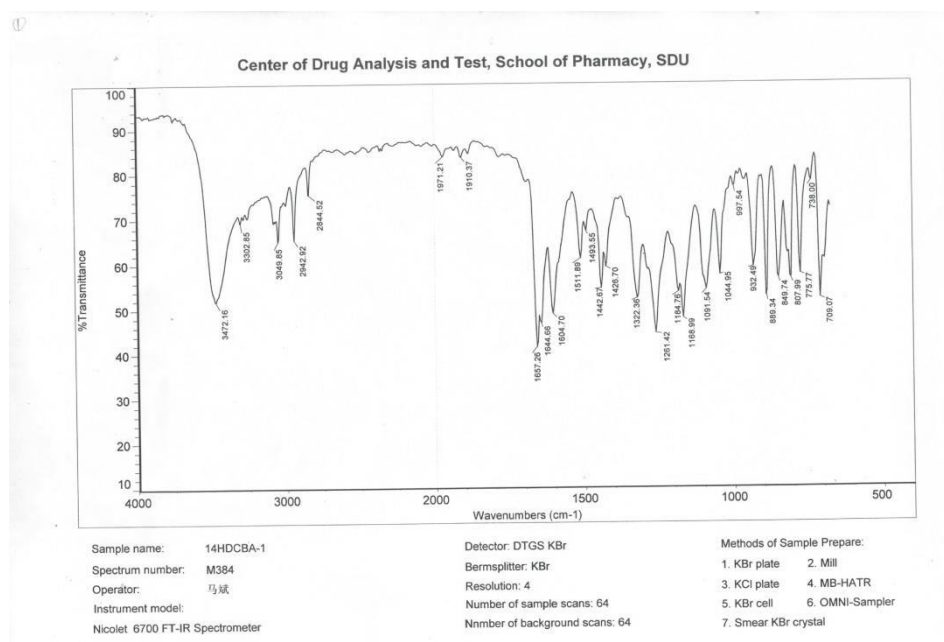

For compound 2:

## S8. <sup>1</sup>H NMR spectrum (400 MHz) of 2 in CDCl<sub>3</sub>

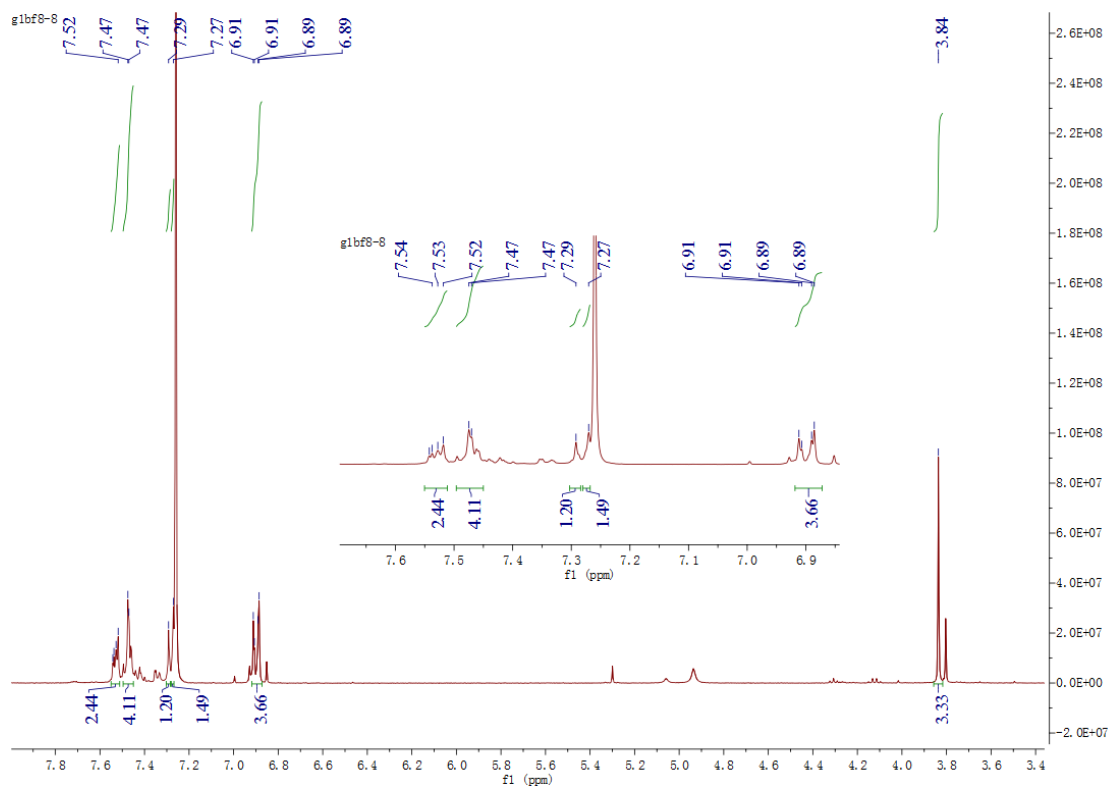



**S9.  $^{13}\text{C}$  NMR spectrum (100 MHz) of 2 in  $\text{CDCl}_3$**

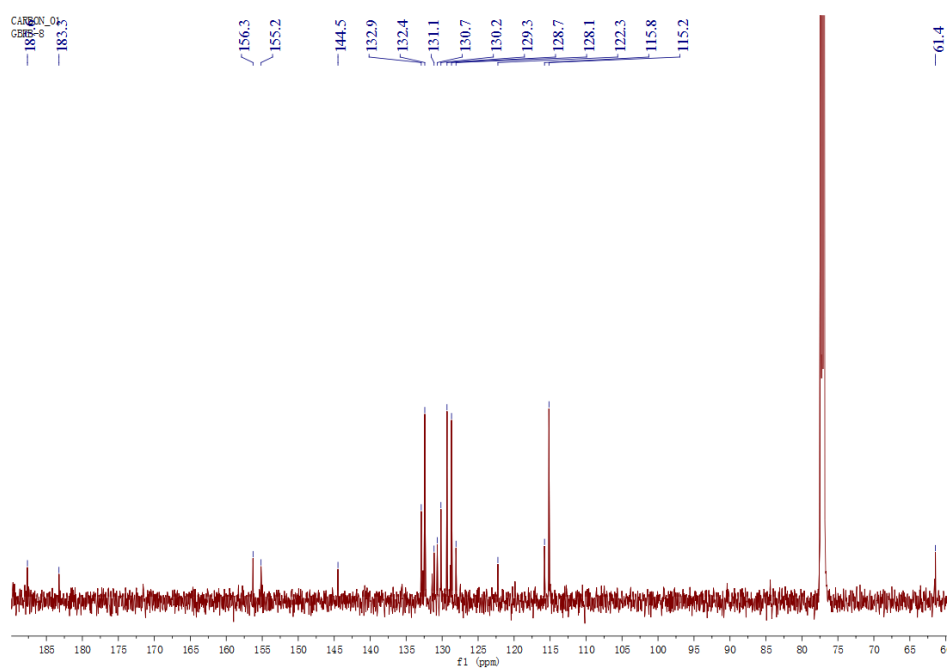

**S10.  $^1\text{H}$ - $^1\text{H}$  COSY spectrum of 2 in  $\text{CDCl}_3$**

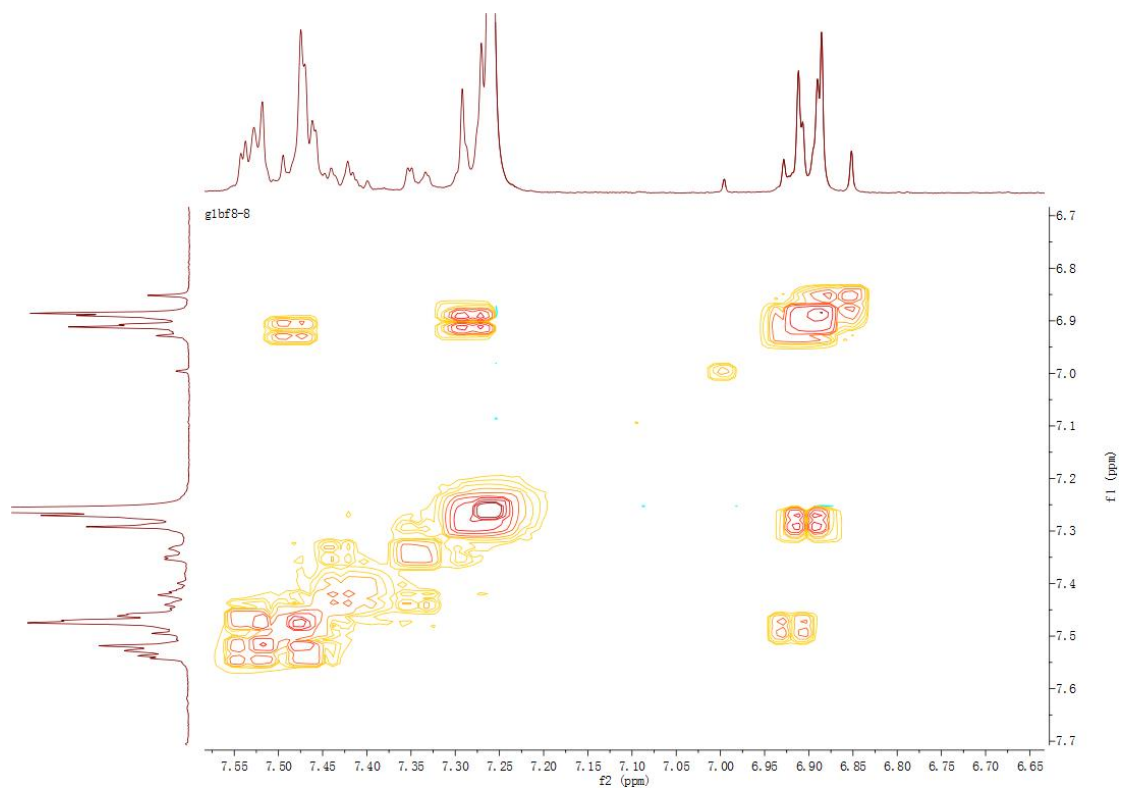

### S11. HSQC spectrum of 2 in CDCl<sub>3</sub>

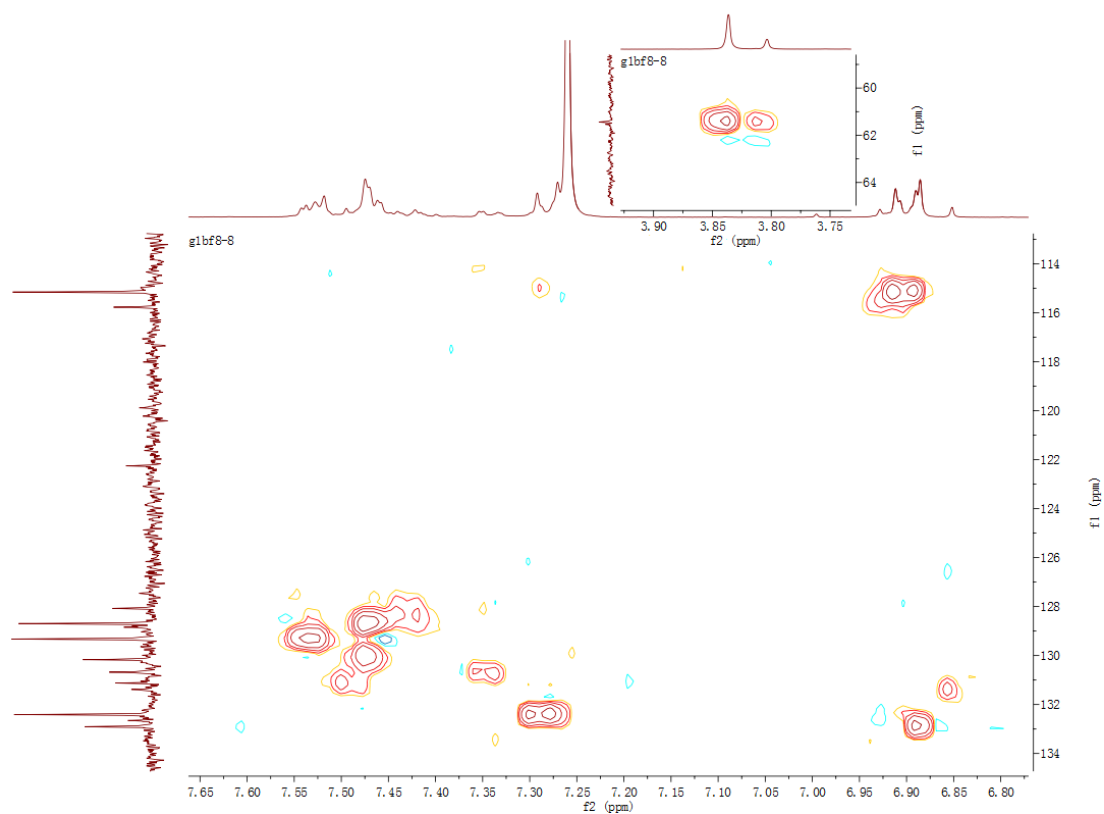

### S12. HMBC spectrum of 2 in CDCl<sub>3</sub>

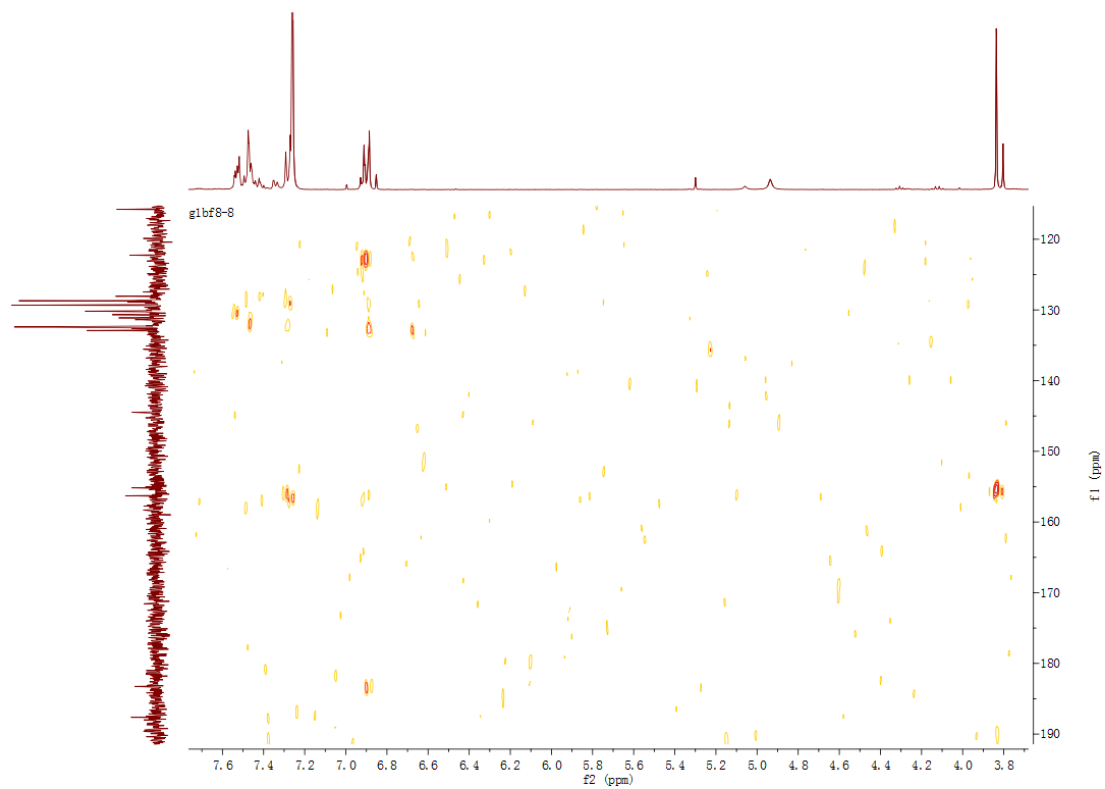

### S13. HRESIMS Spectrum of Compound 2

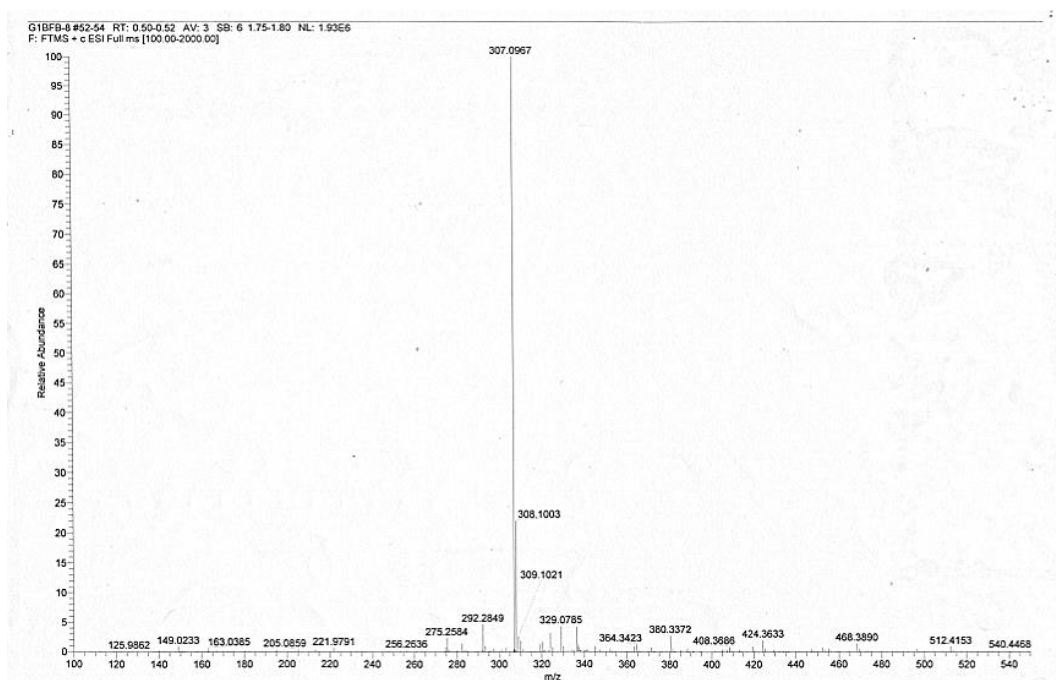

### S14. IR Spectrum of Compound 2

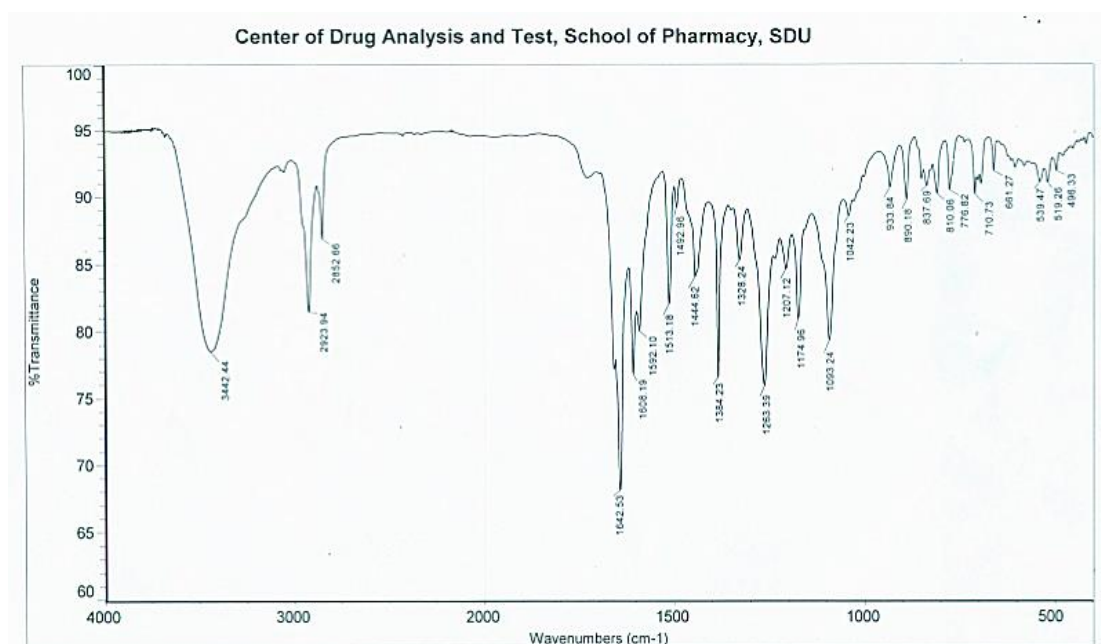

For compound 3:

S15.  $^1\text{H}$  NMR spectrum (400 MHz) of 3 in  $\text{CDCl}_3$

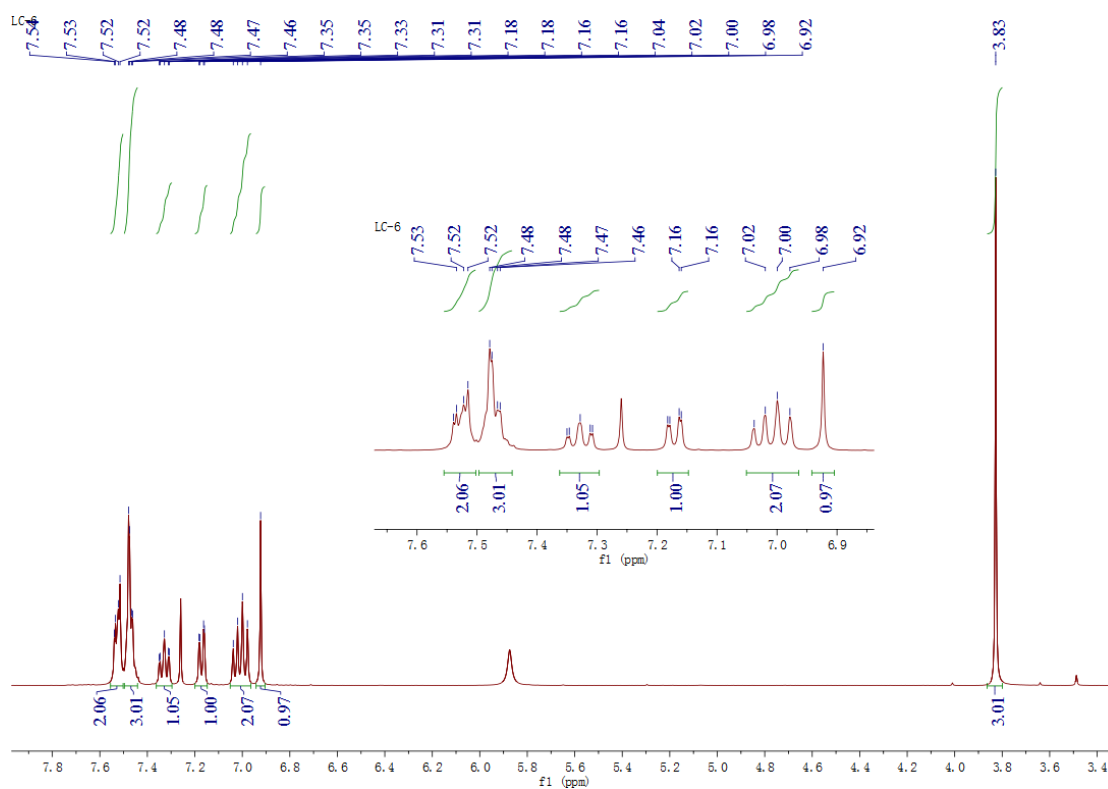

S16.  $^{13}\text{C}$  NMR spectrum (100 MHz) of 3 in  $\text{CDCl}_3$

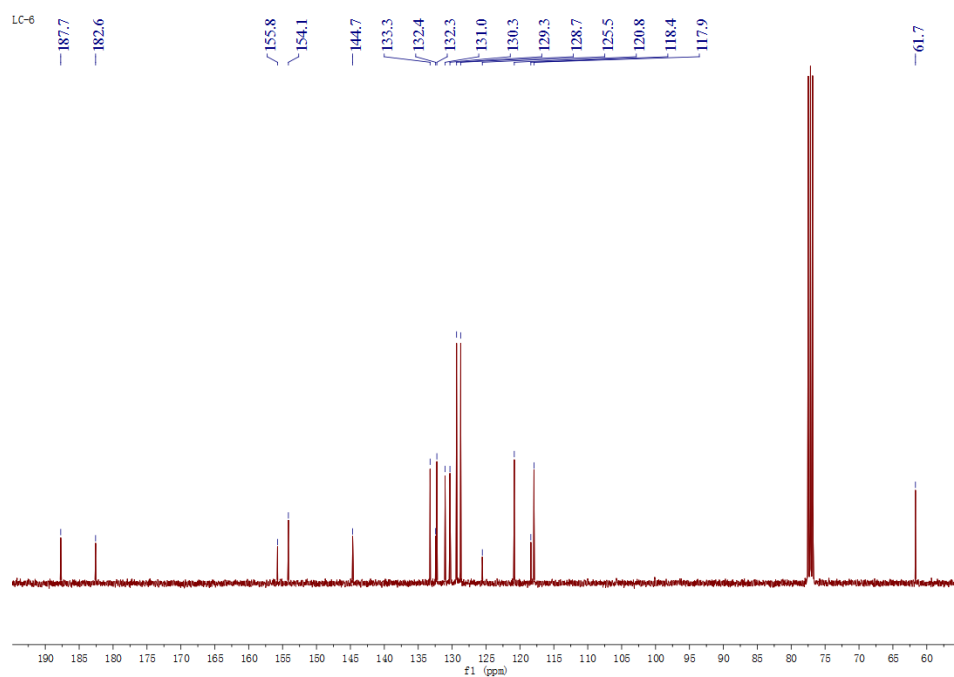

**S17.  $^1\text{H}$ - $^1\text{H}$  COSY spectrum of 3 in  $\text{CDCl}_3$**

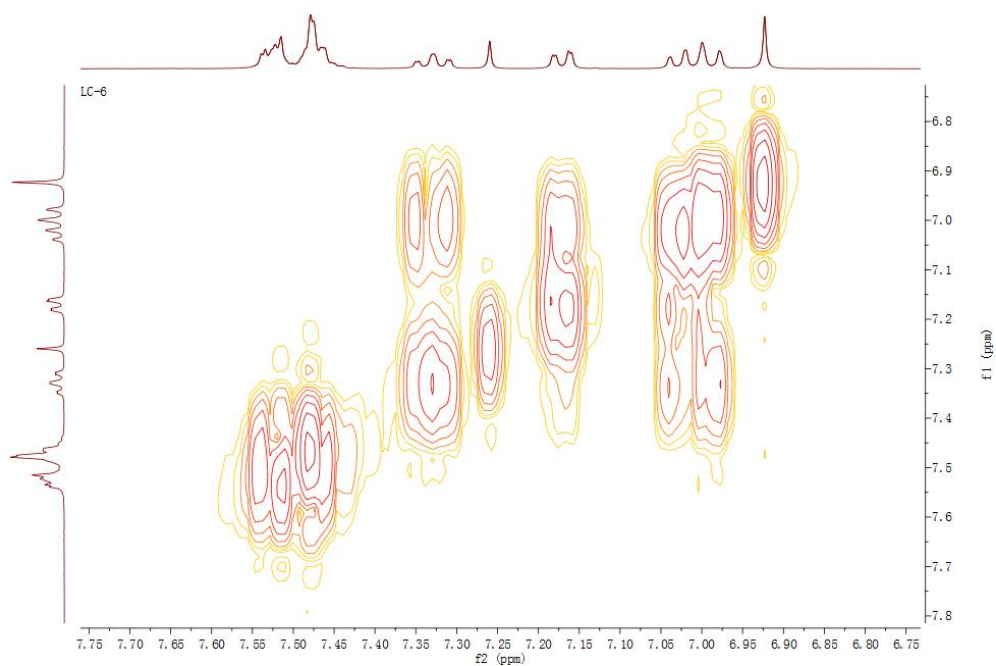

**S18. HSQC spectrum of 3 in  $\text{CDCl}_3$**

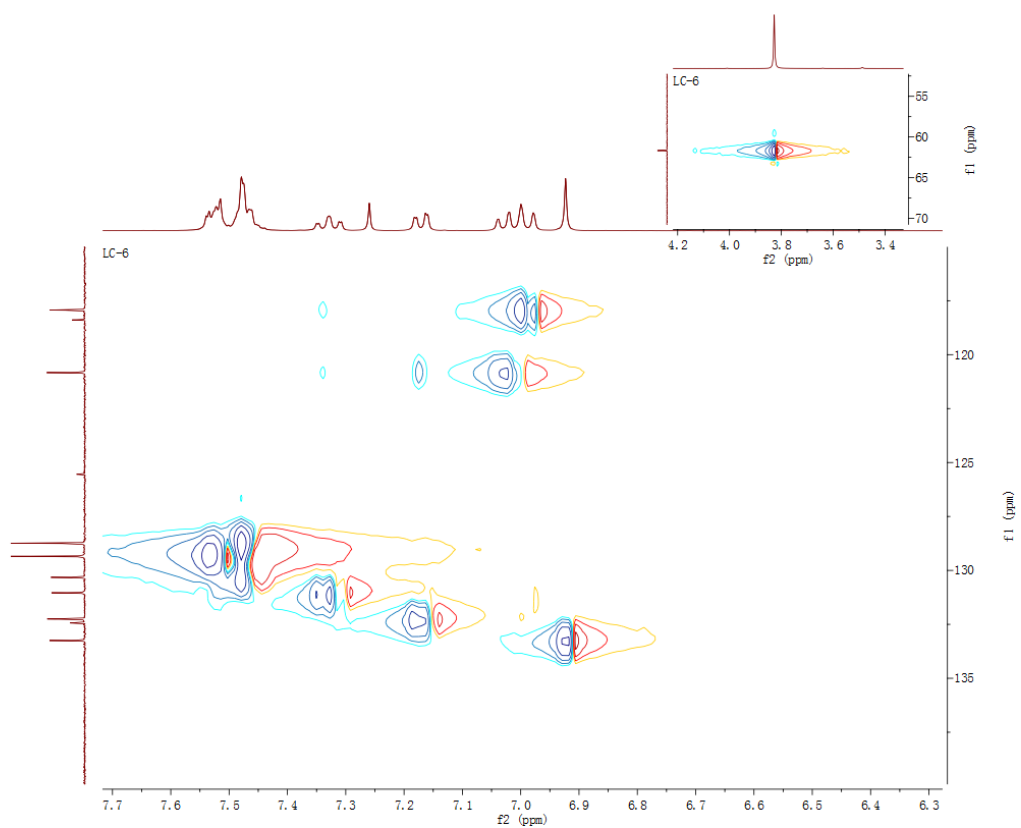

### S19. HMBC spectrum of 3 in CDCl<sub>3</sub>

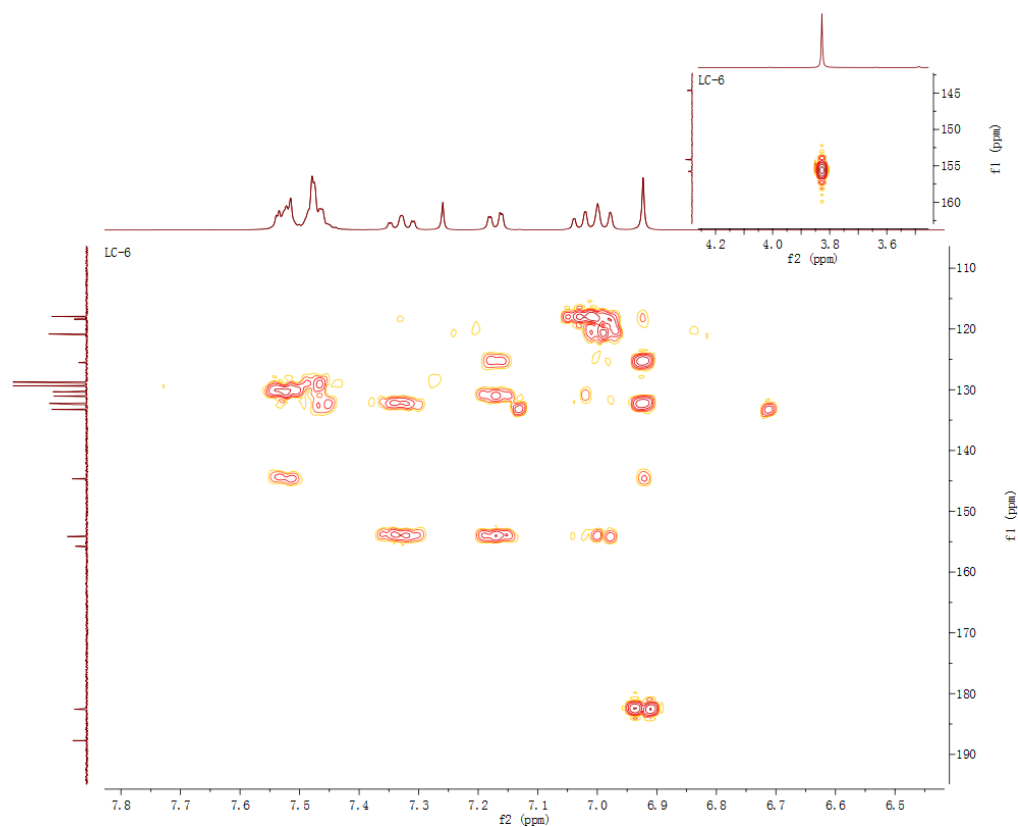

### S20. HRESIMS Spectrum of Compound 3

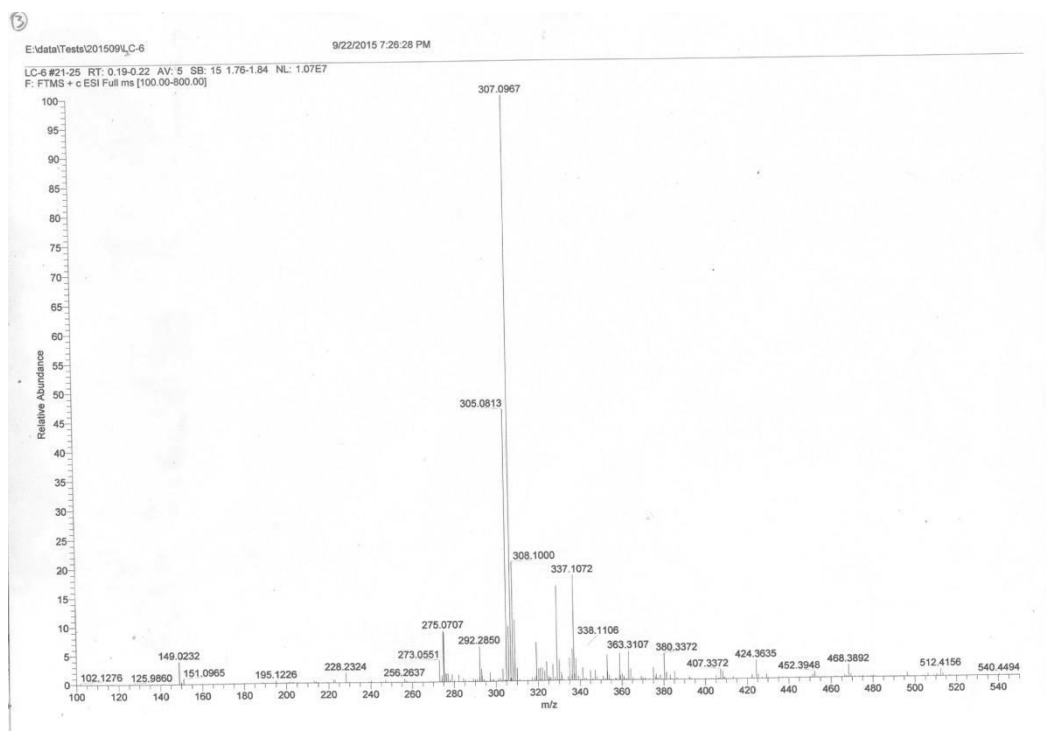

## S21. IR Spectrum of Compound 3

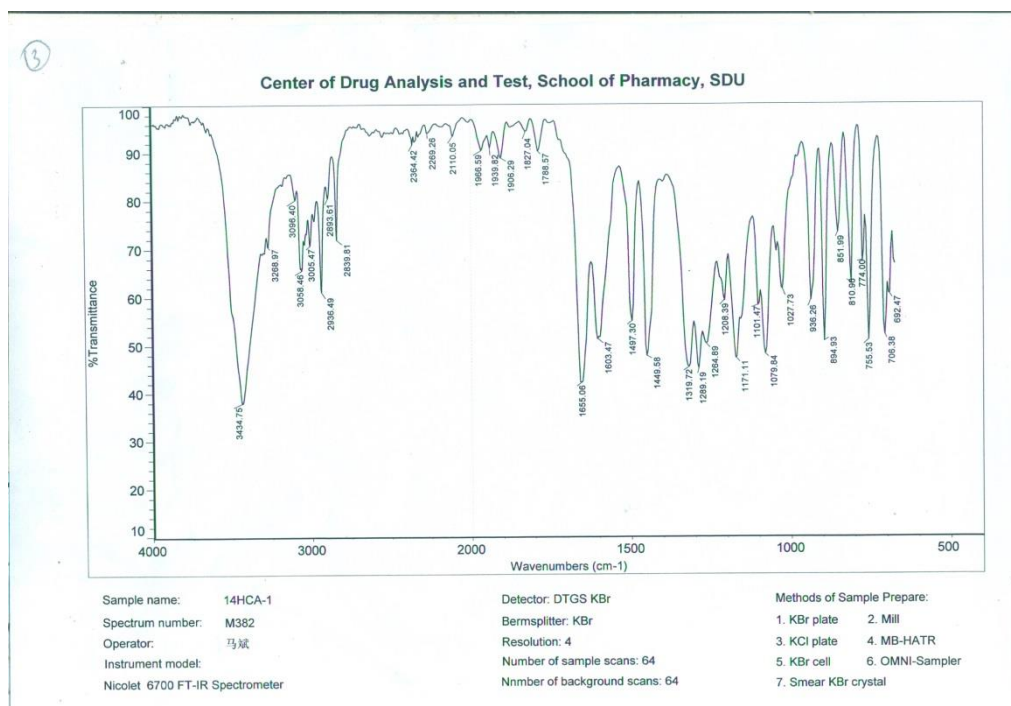

For compound 4:

## S22. $^1\text{H}$ NMR spectrum (400 MHz) of 4 in $\text{CD}_3\text{OD}$

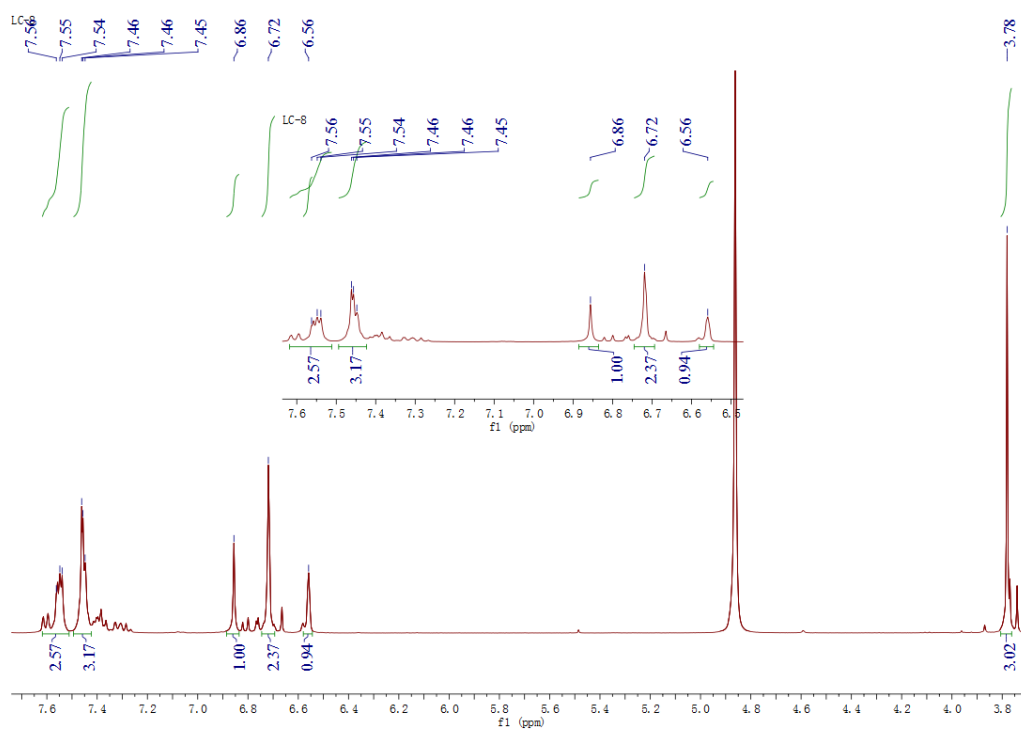

**S23.  $^{13}\text{C}$  NMR spectrum (100 MHz) of 4 in  $\text{CD}_3\text{OD}$**

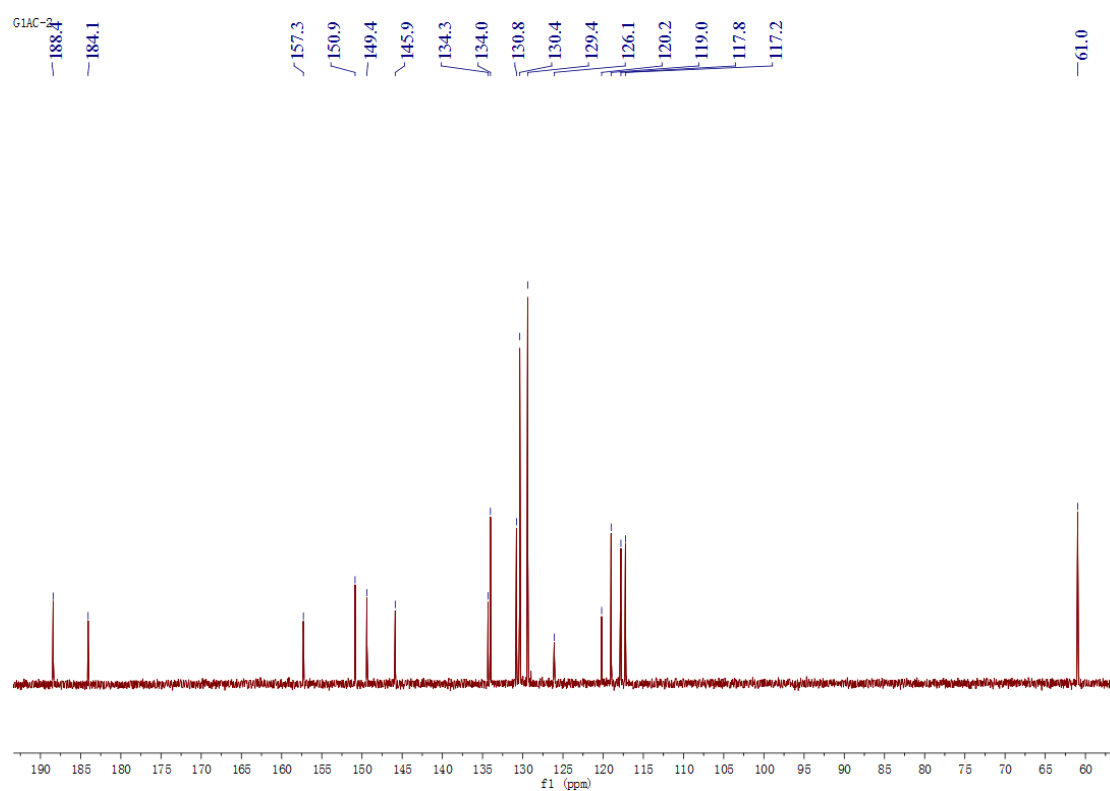

**S24.  $^1\text{H}$ - $^1\text{H}$  COSY spectrum of 4 in  $\text{CD}_3\text{OD}$**

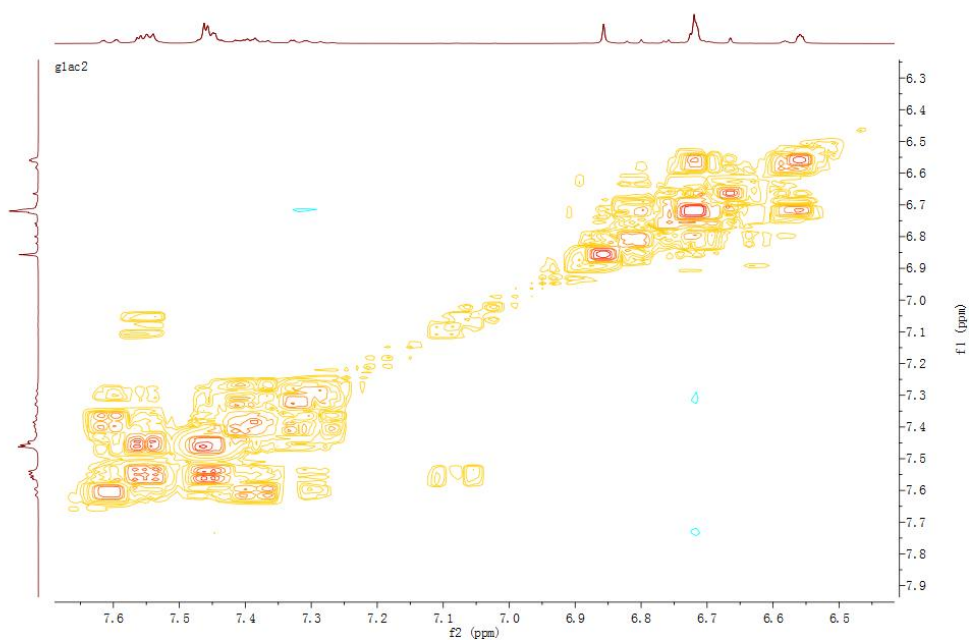



**S25. HSQC spectrum of 4 in CD<sub>3</sub>OD**

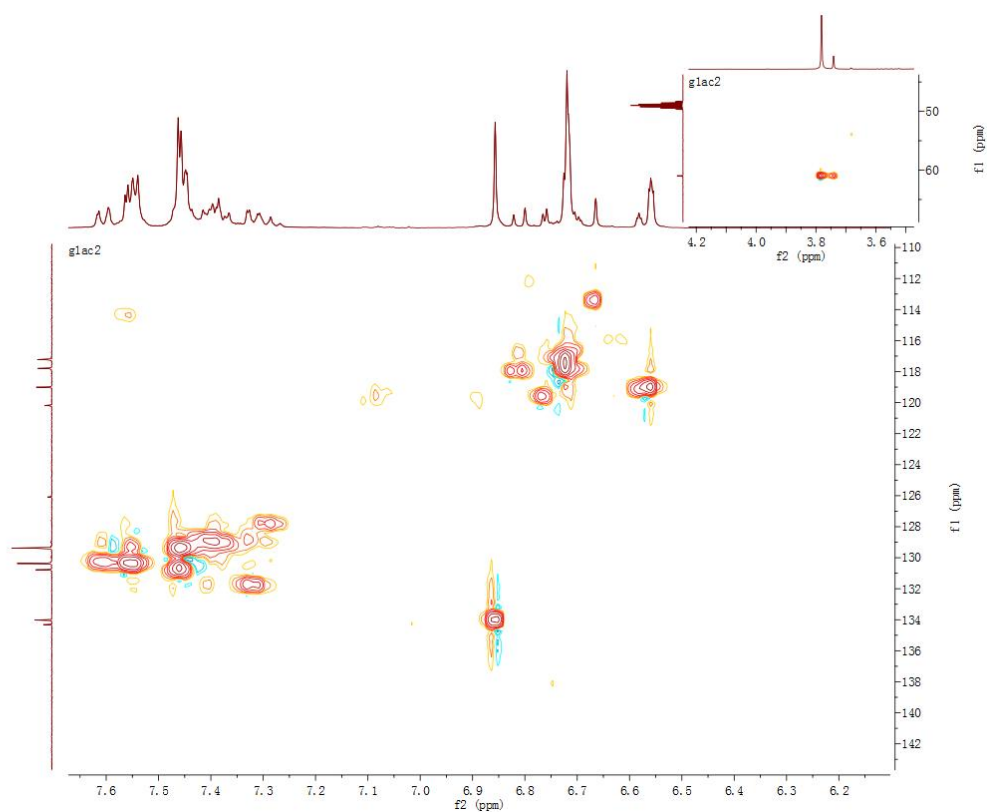

**S26. HMBC spectrum of 4 in CD<sub>3</sub>OD**

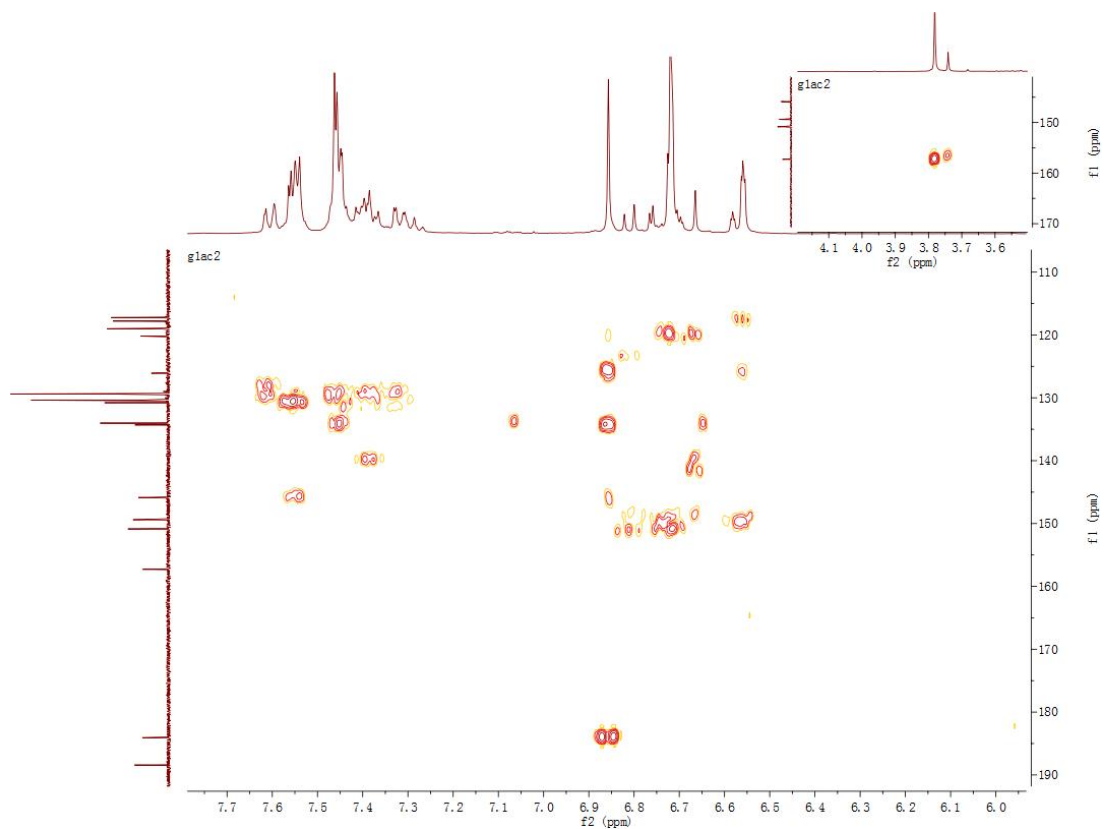

## S27. HRESIMS Spectrum of Compound 4

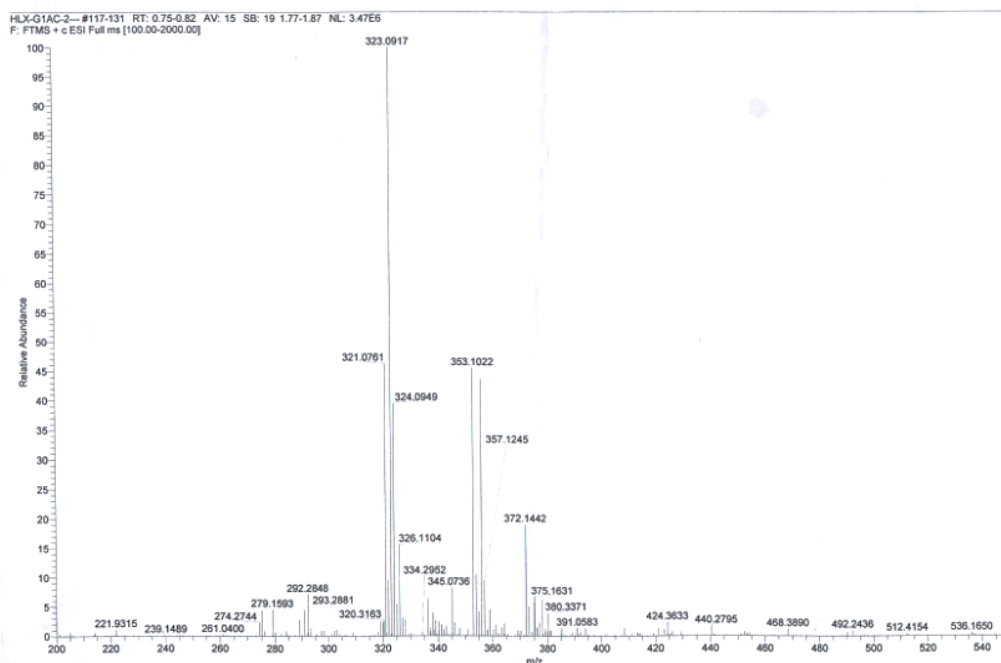

## S28. IR Spectrum of Compound 4

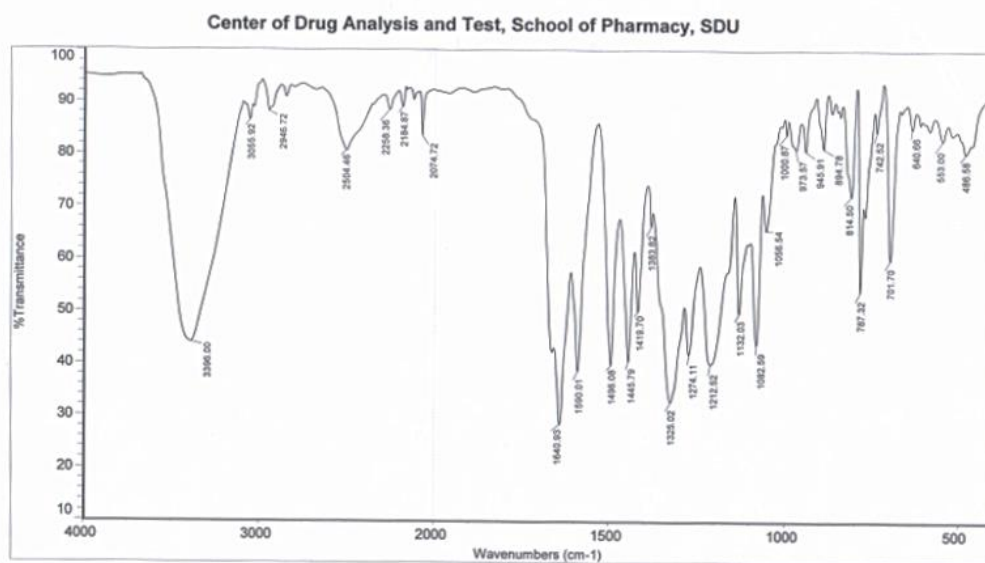

For compound 5:

**S29.  $^1\text{H}$  NMR spectrum (600 MHz) of 5 in  $\text{CD}_3\text{OD}$**

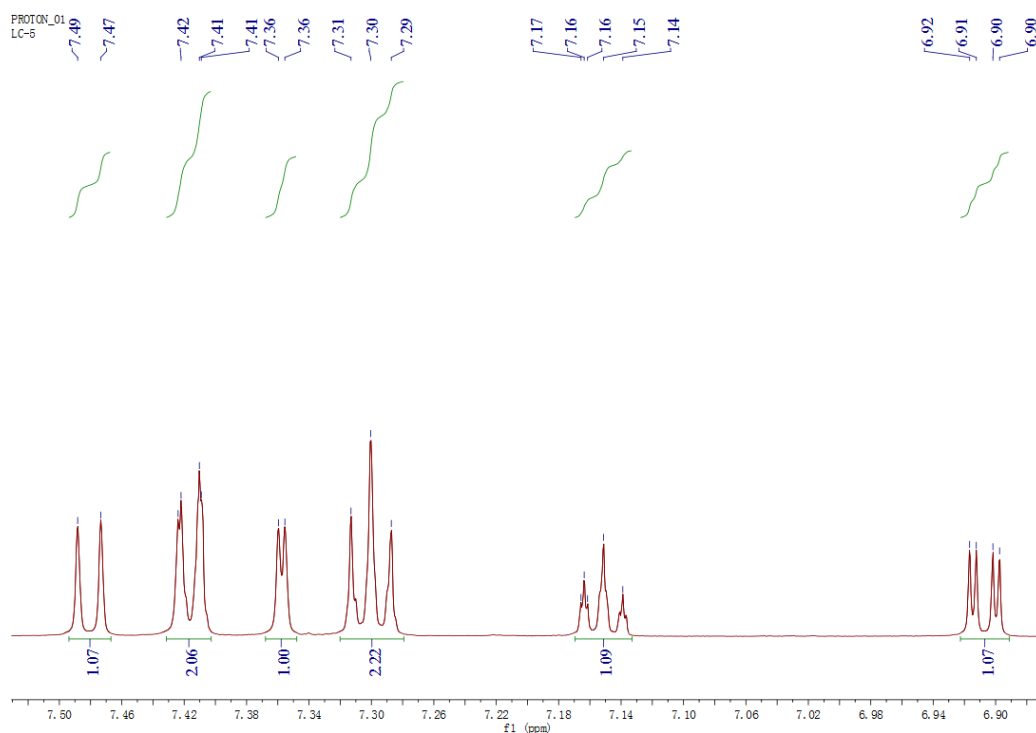

**S30.  $^{13}\text{C}$  NMR spectrum (150 MHz) of 5 in  $\text{CD}_3\text{OD}$**

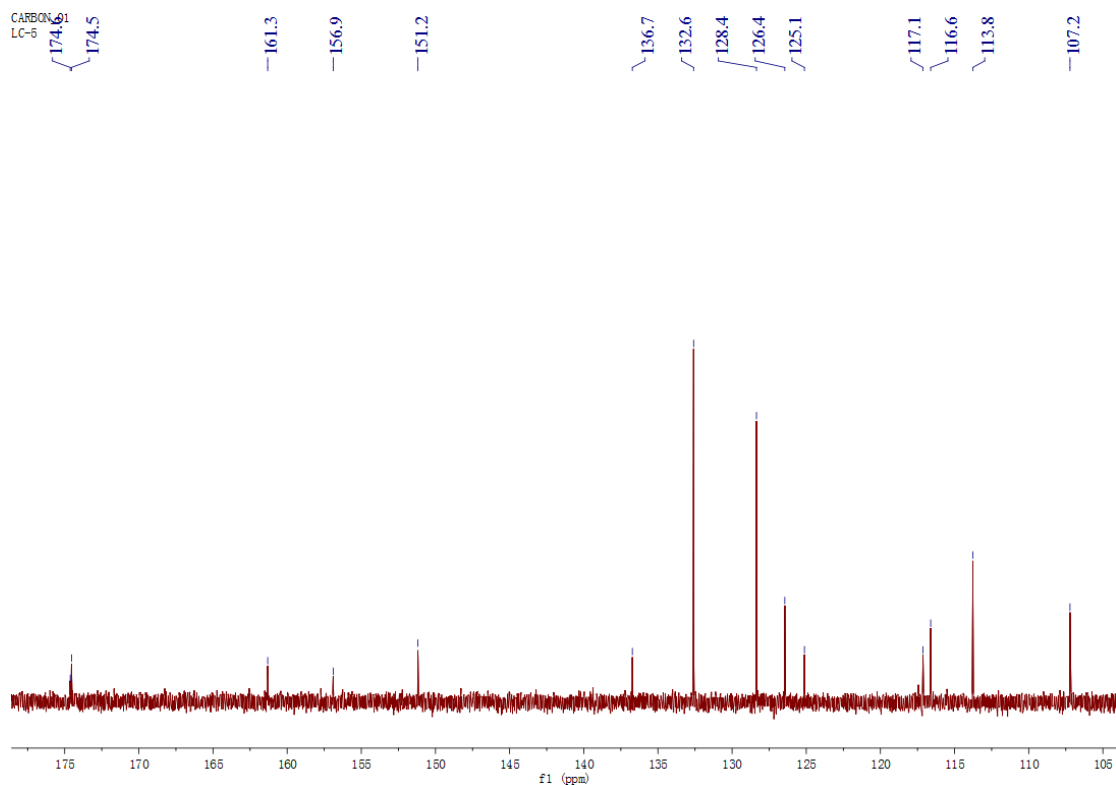

**S31.  $^1\text{H}$ - $^1\text{H}$  COSY spectrum of 5 in  $\text{CD}_3\text{OD}$**

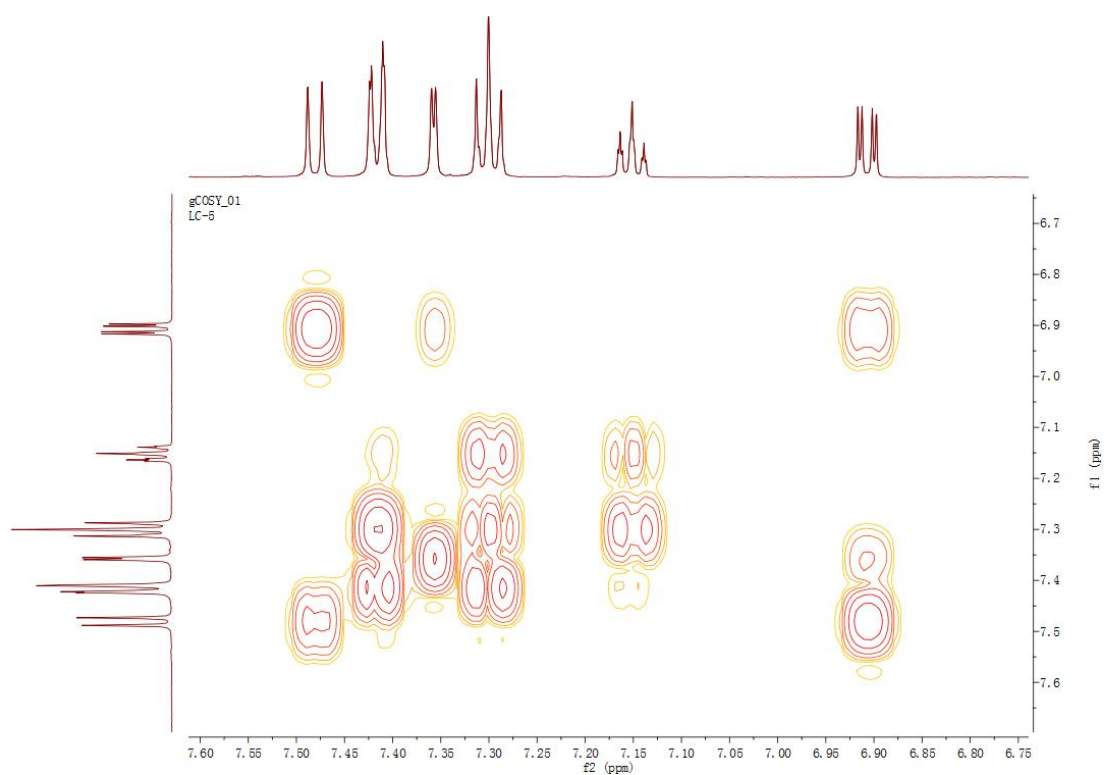

**S32. HSQC spectrum of 5 in  $\text{CD}_3\text{OD}$**

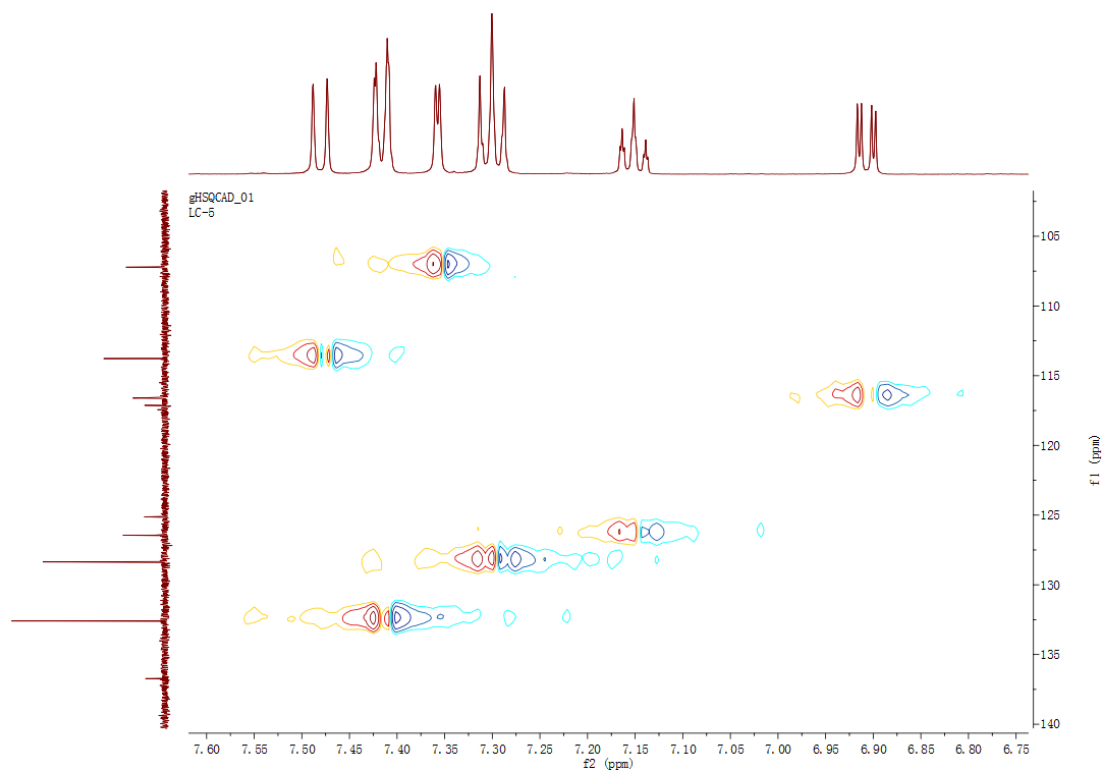

### S33. HMBC spectrum of 5 in CD<sub>3</sub>OD

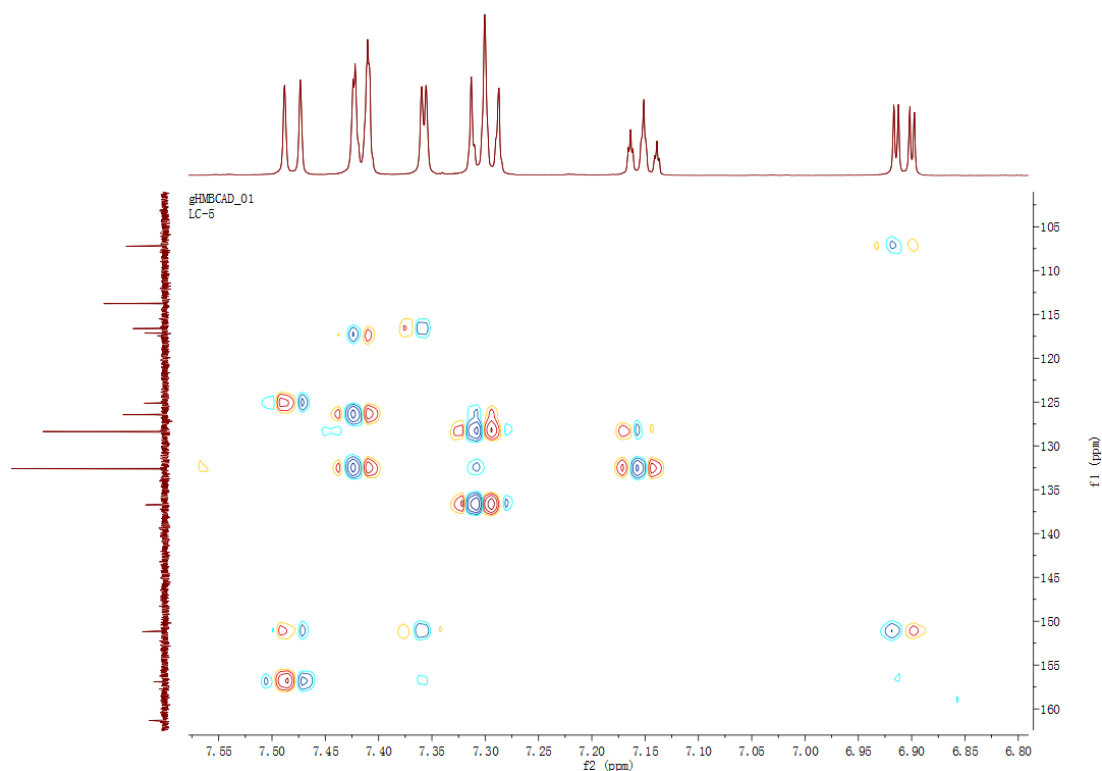

### S34. HRESIMS Spectrum of Compound 5

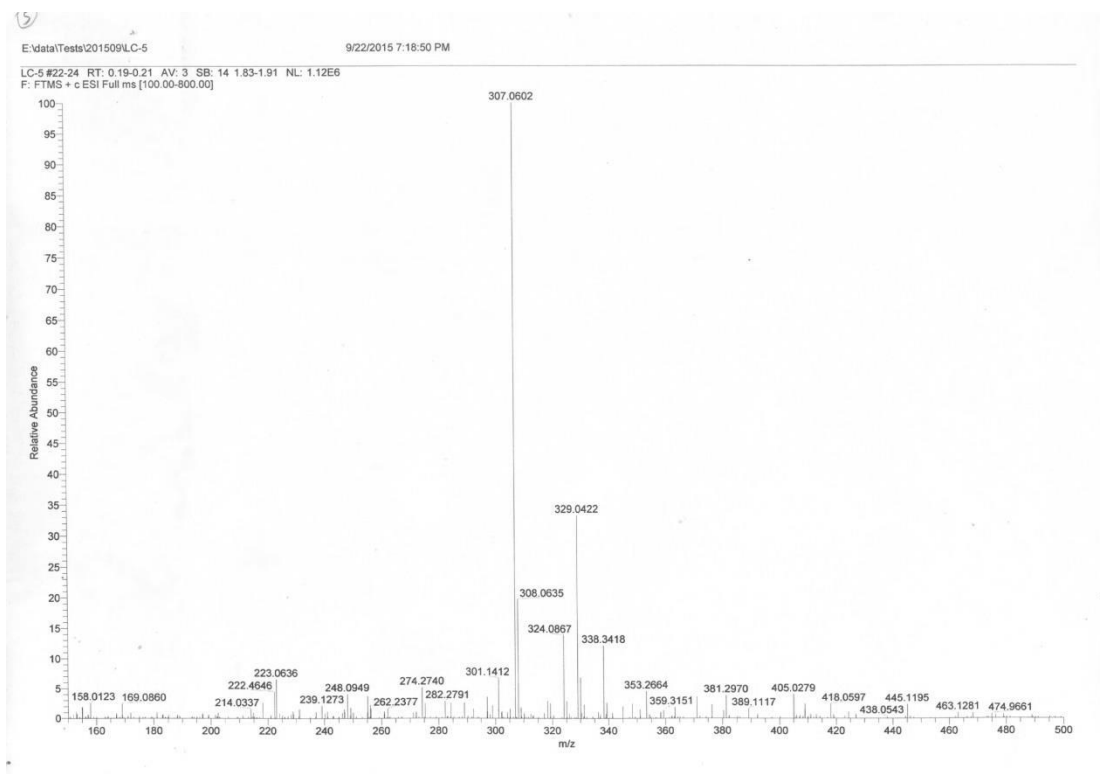

### S35. IR Spectrum of Compound 5

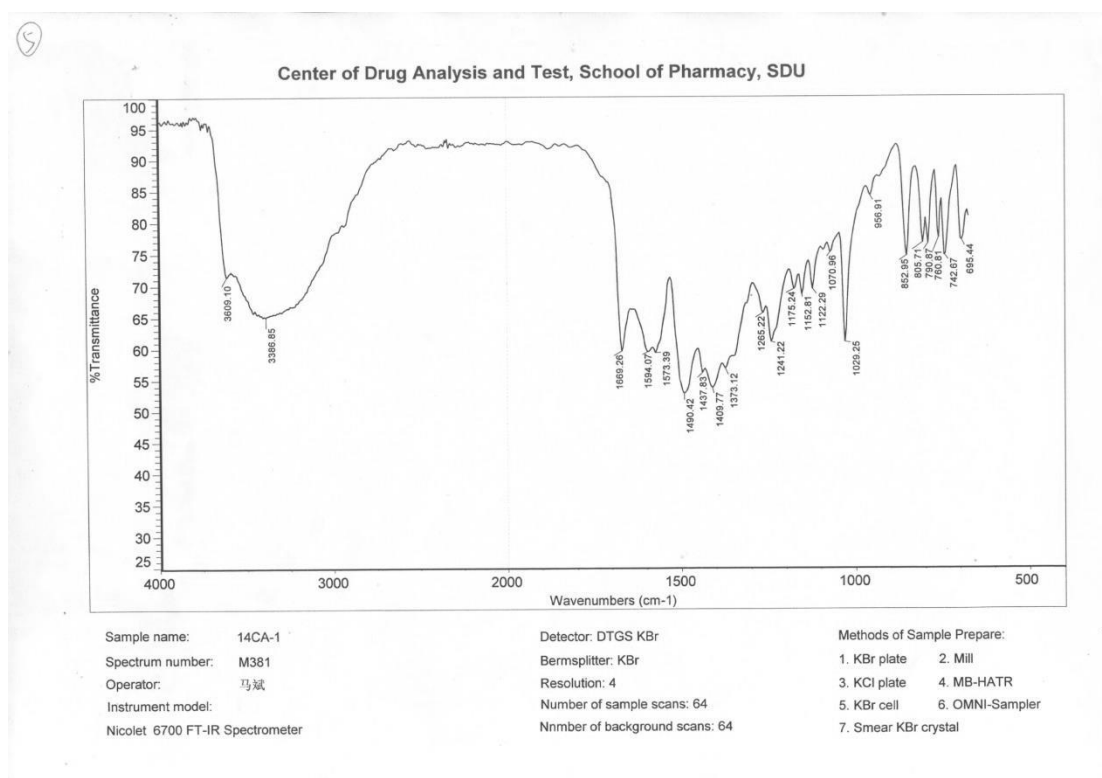

For compound 6:

### S36. <sup>1</sup>H NMR spectrum (600 MHz) of 6 in acetone-d<sub>6</sub>

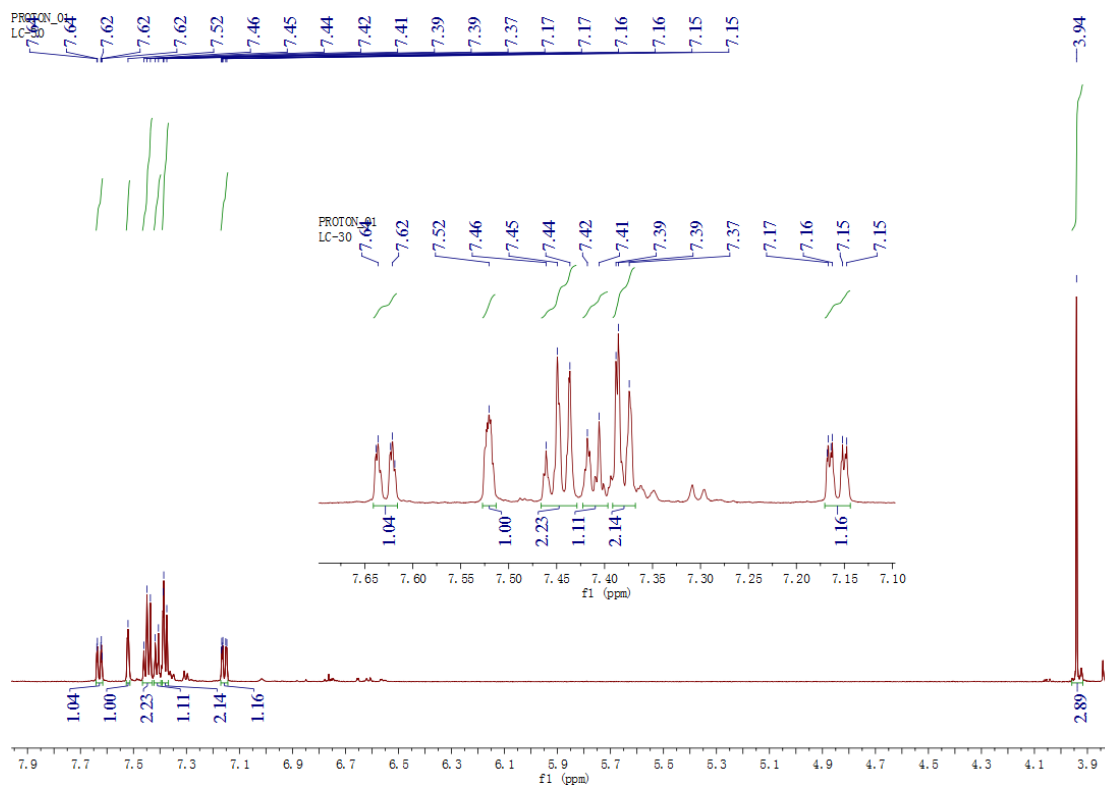

**S37.  $^{13}\text{C}$  NMR spectrum (150 MHz) of 6 in acetone- $d_6$**

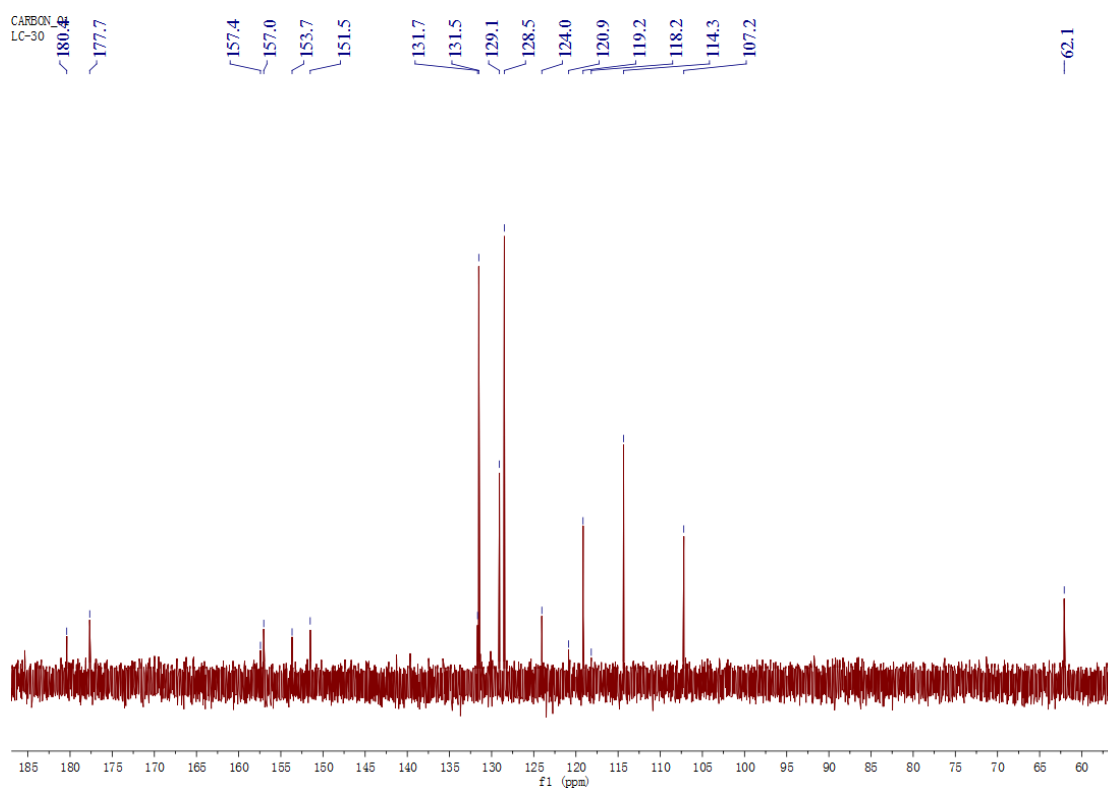

**S38.  $^1\text{H}$ - $^1\text{H}$  COSY spectrum of 6 in acetone- $d_6$**

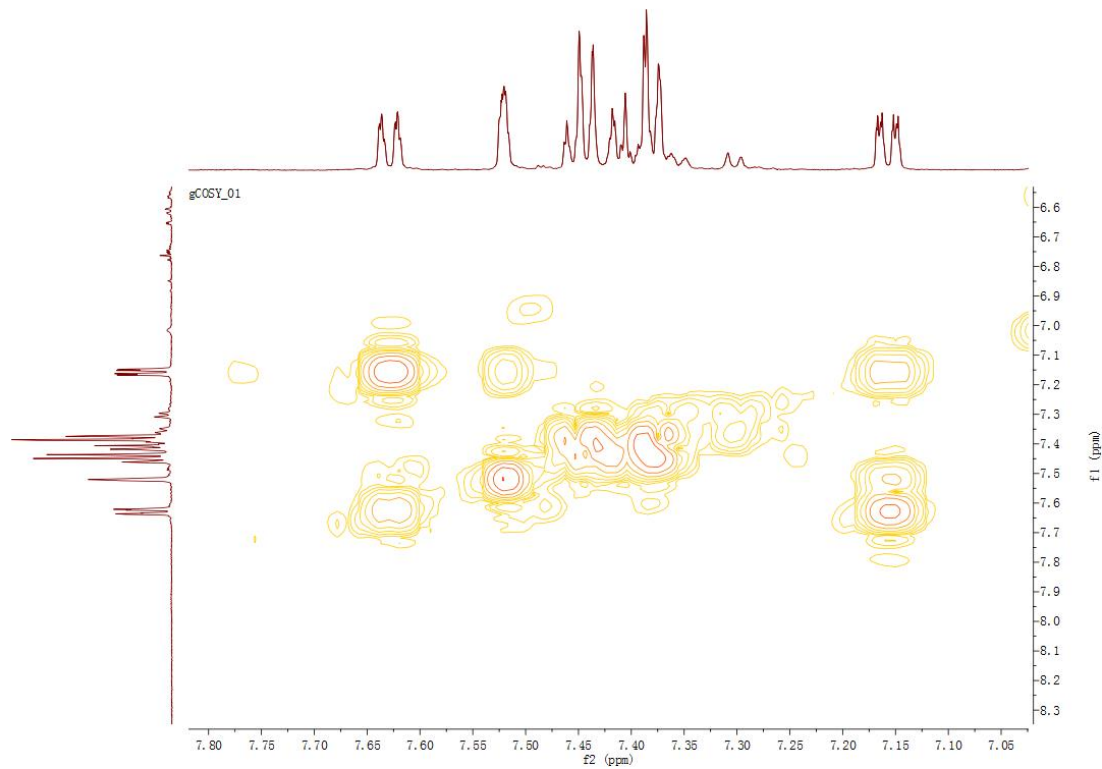

**S39. HSQC spectrum of 6 in acetone- $d_6$**

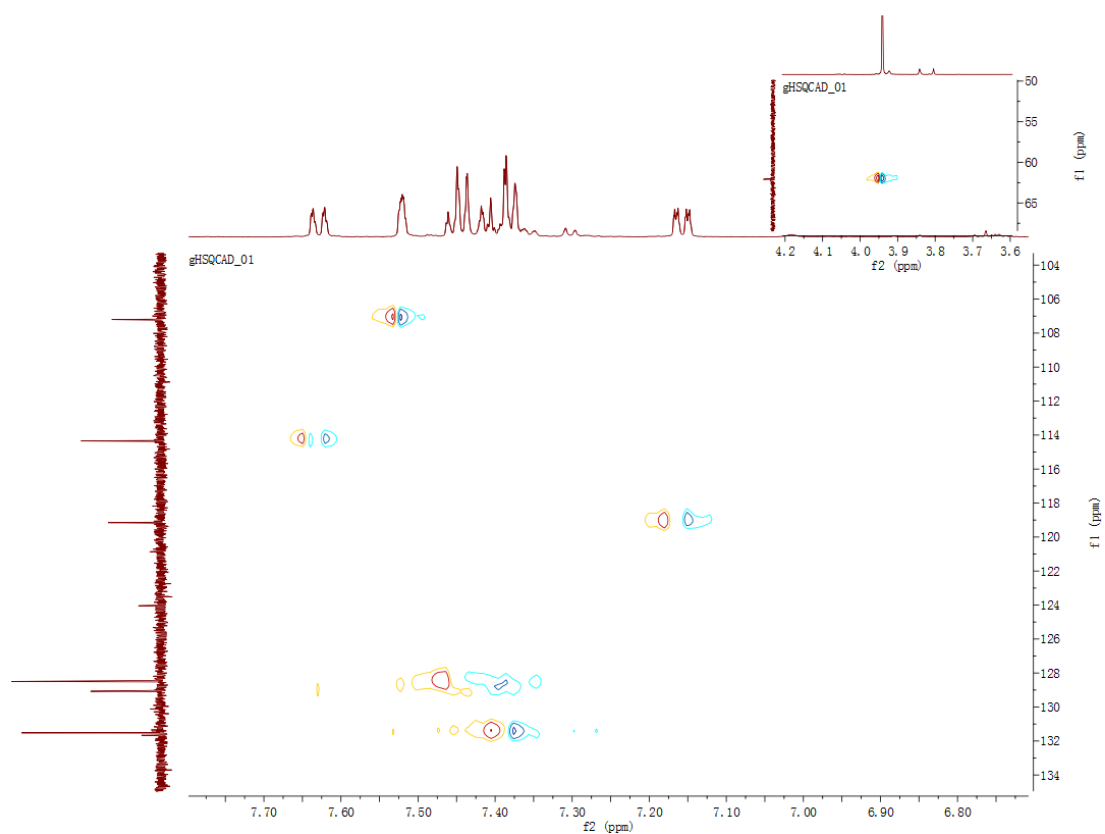

**S40. HMBC spectrum of 6 in acetone- $d_6$**

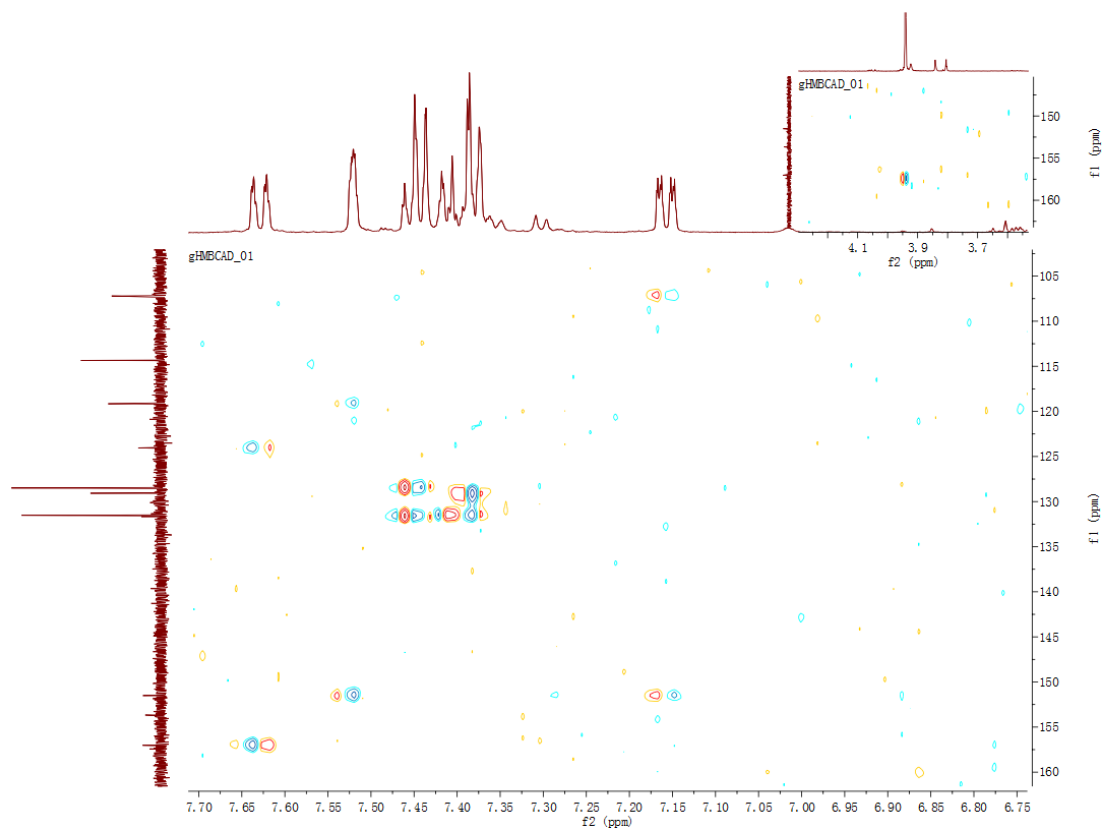



## S41. HRESIMS Spectrum of Compound 6

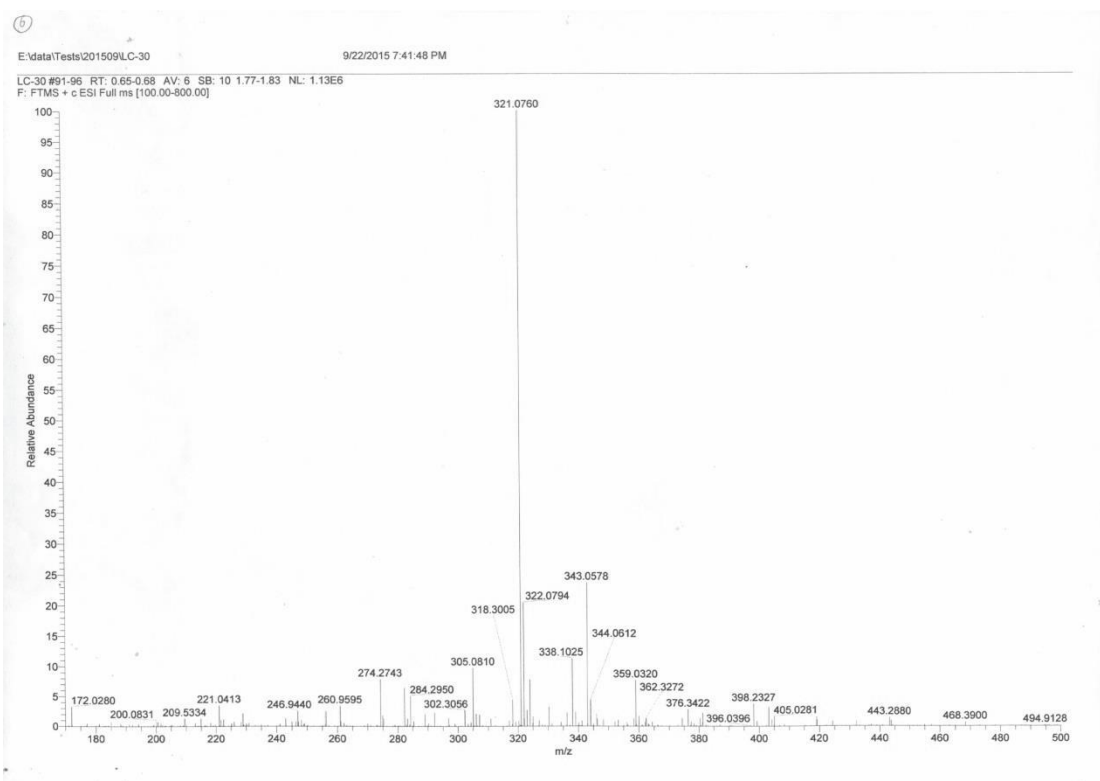

## S42. IR Spectrum of Compound 6

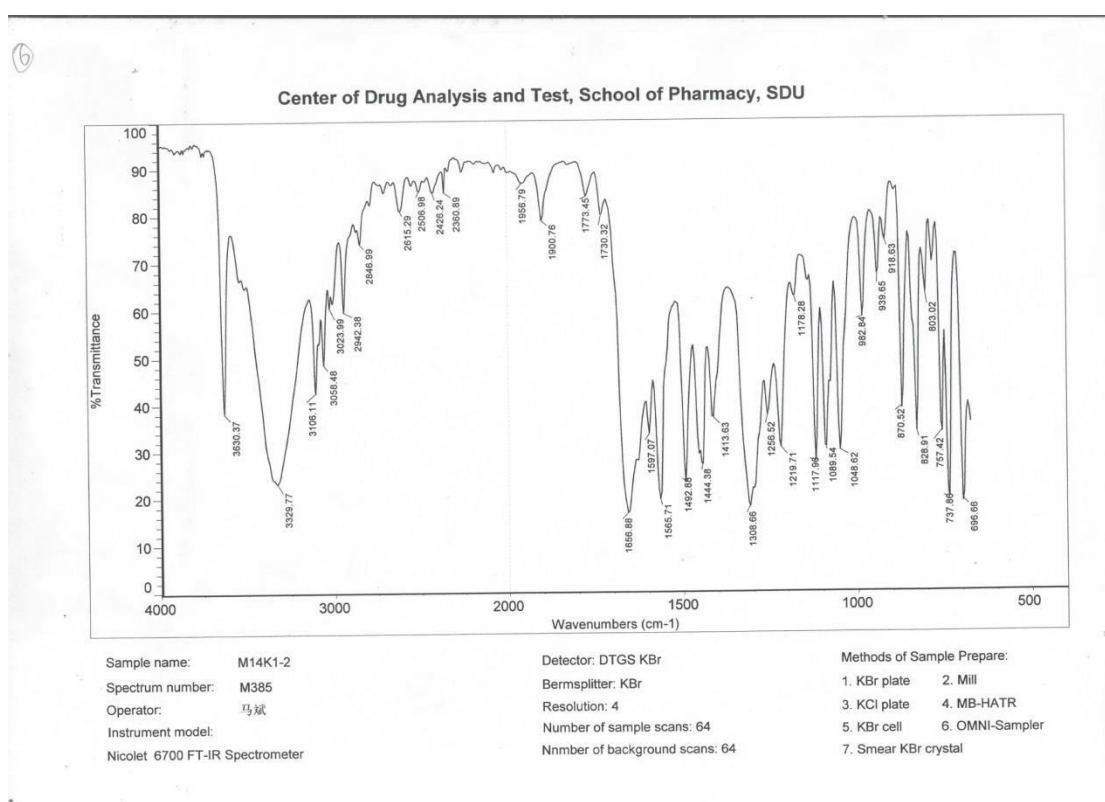

For compound 7:

**S43.  $^1\text{H}$  NMR spectrum (400 MHz) of 7 in  $\text{CDCl}_3$**

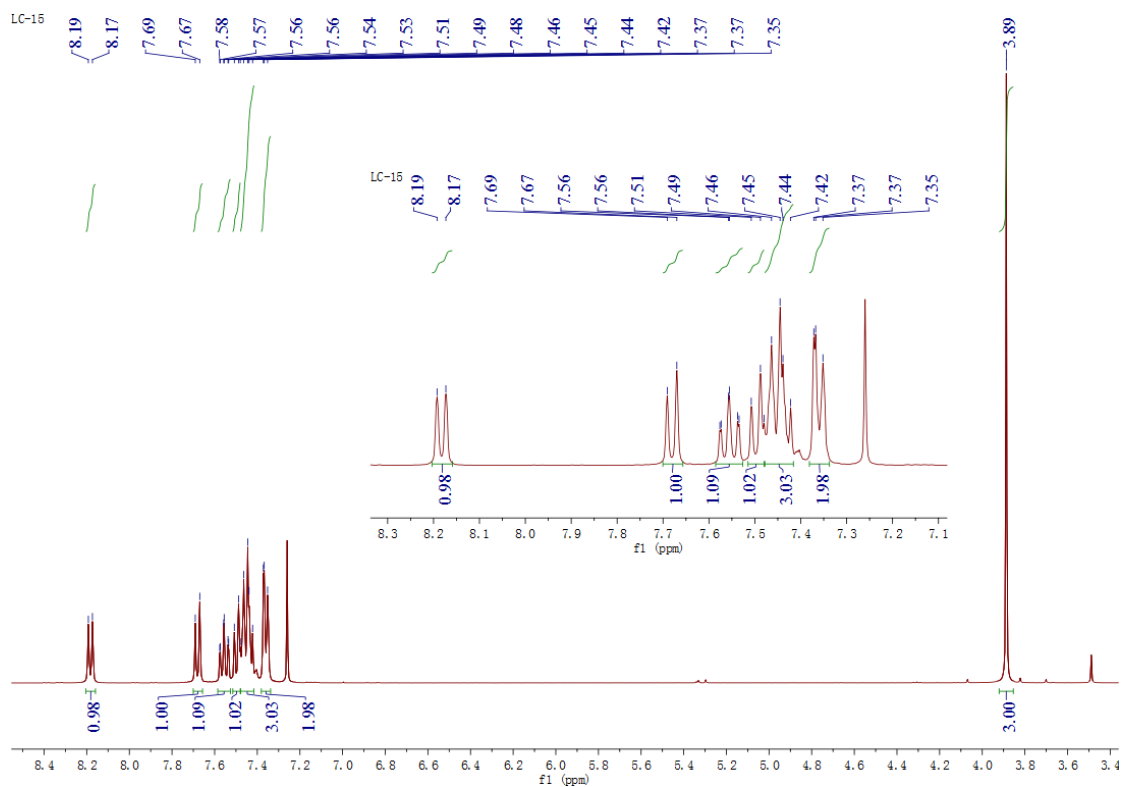

**S44.  $^{13}\text{C}$  NMR spectrum (100 MHz) of 7 in  $\text{CDCl}_3$**

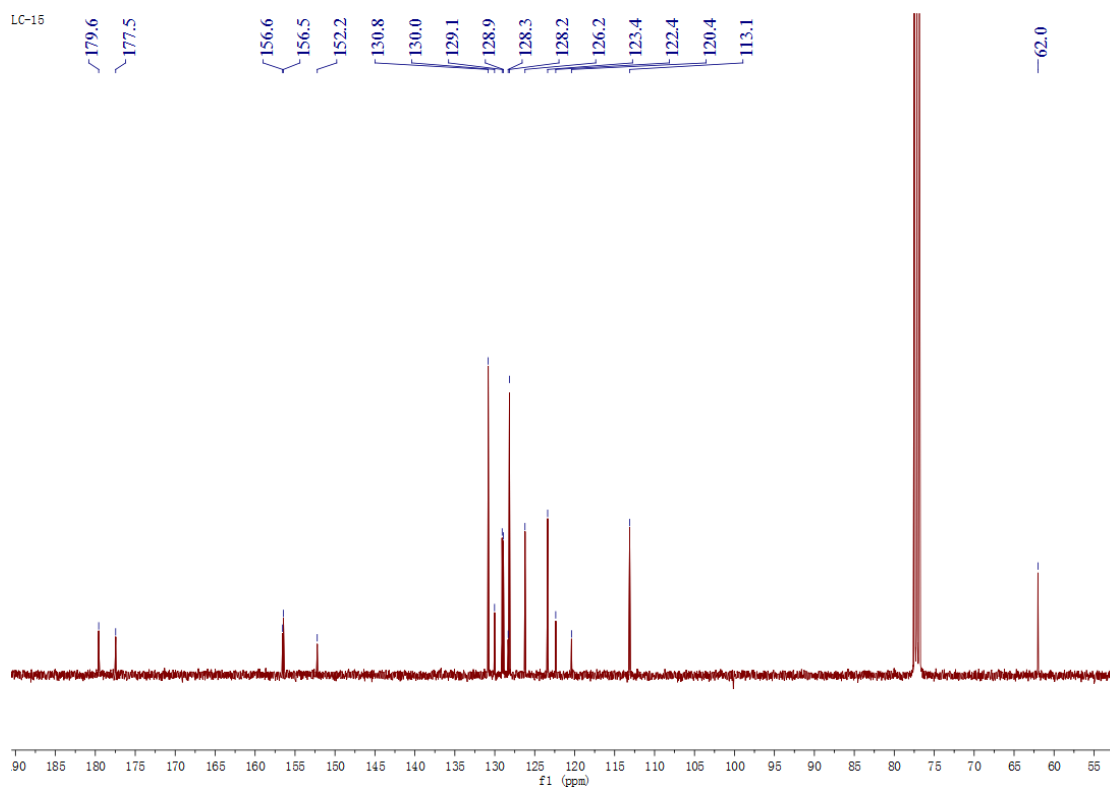

**S45.  $^1\text{H}$ - $^1\text{H}$  COSY spectrum of 7 in  $\text{CDCl}_3$**

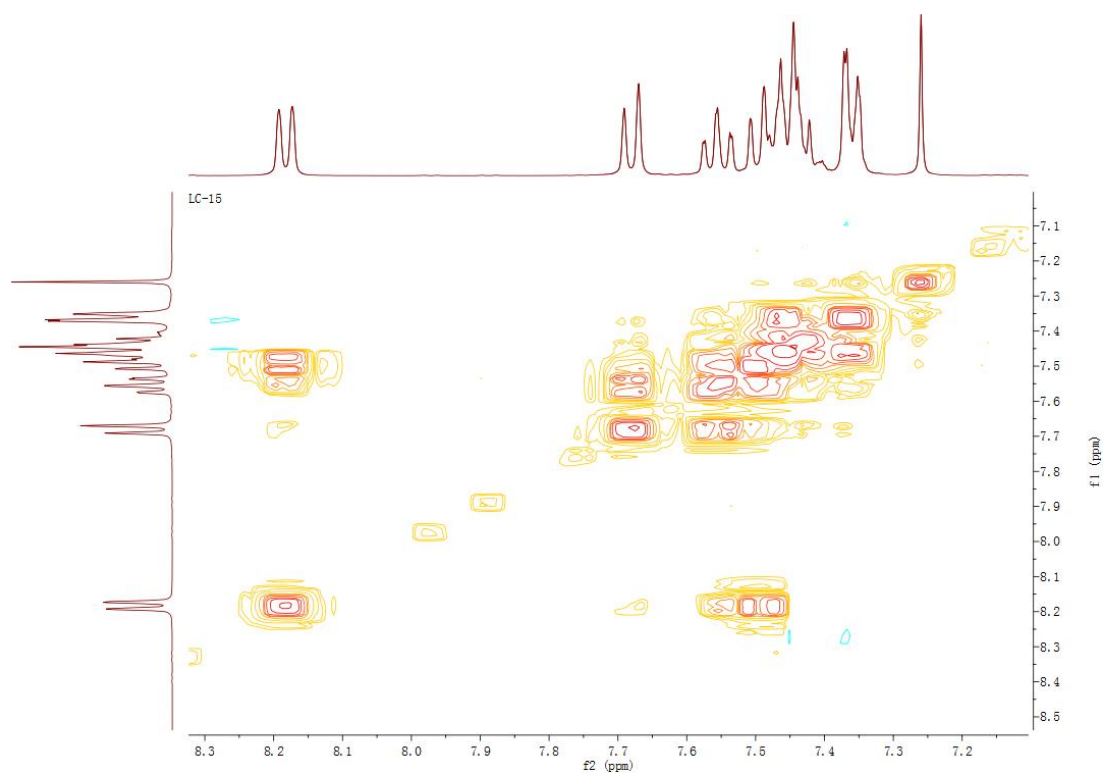

**S46. HSQC spectrum of 7 in  $\text{CDCl}_3$**

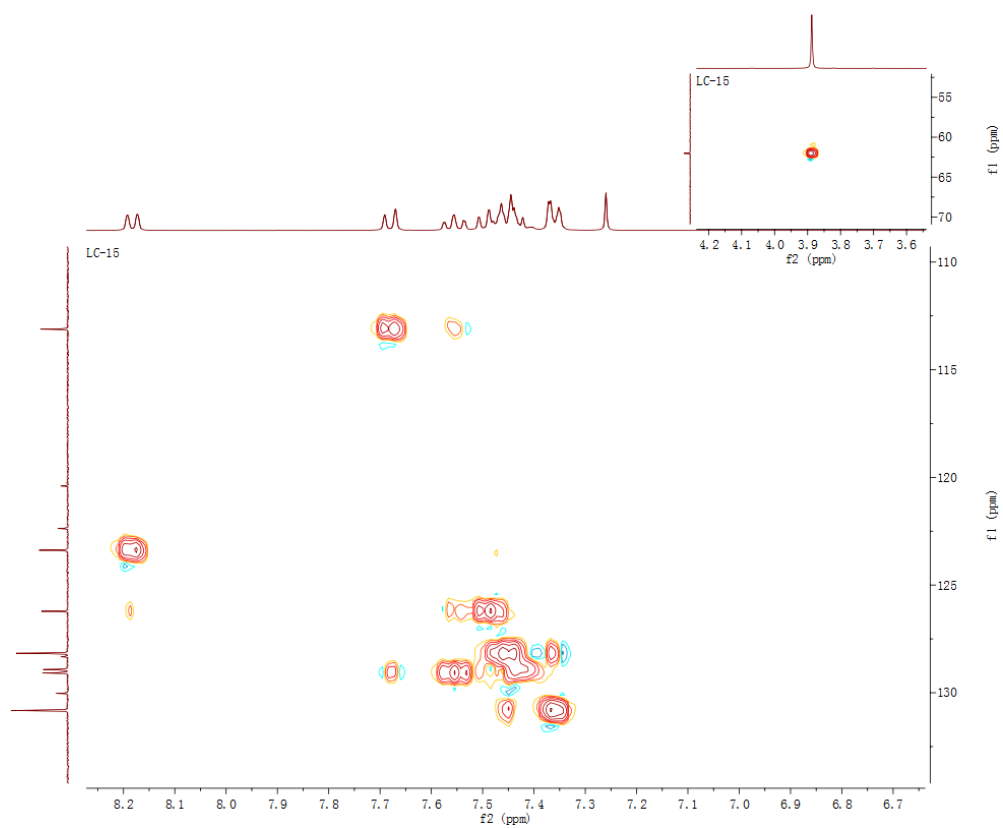

### S47. HMBC spectrum of 7 in CDCl<sub>3</sub>

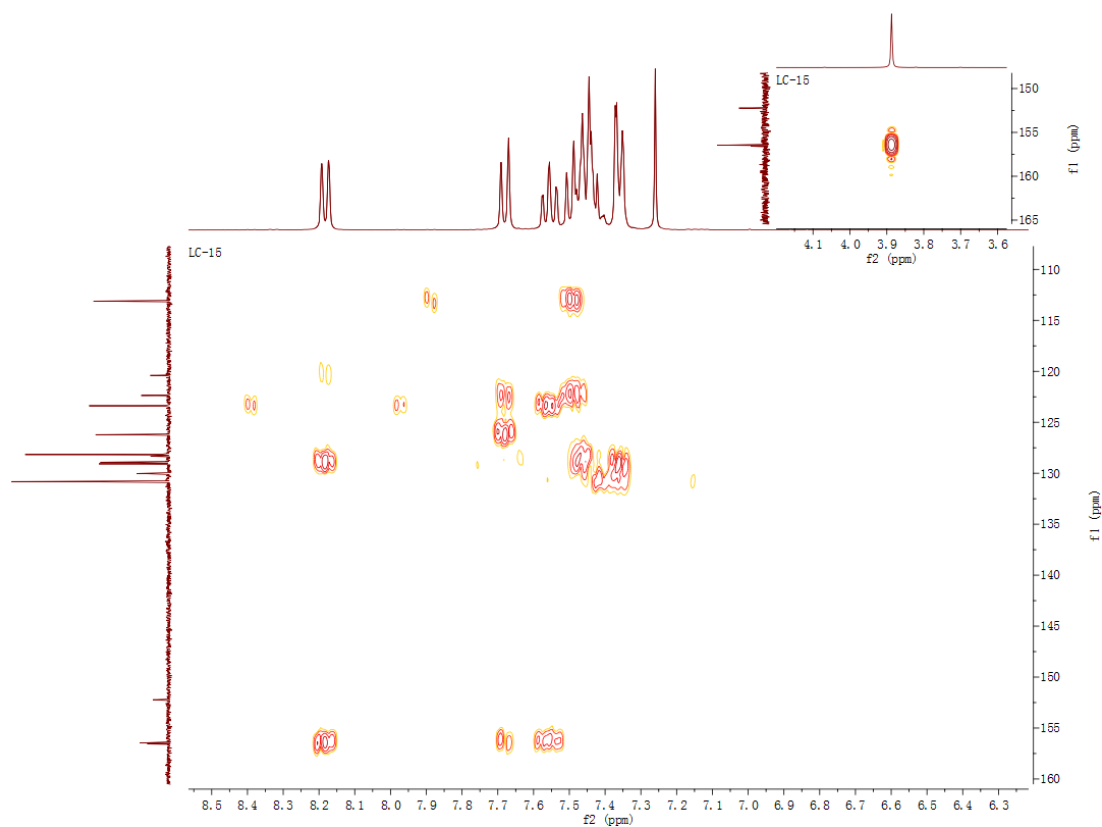

### S48. HRESIMS Spectrum of Compound 7

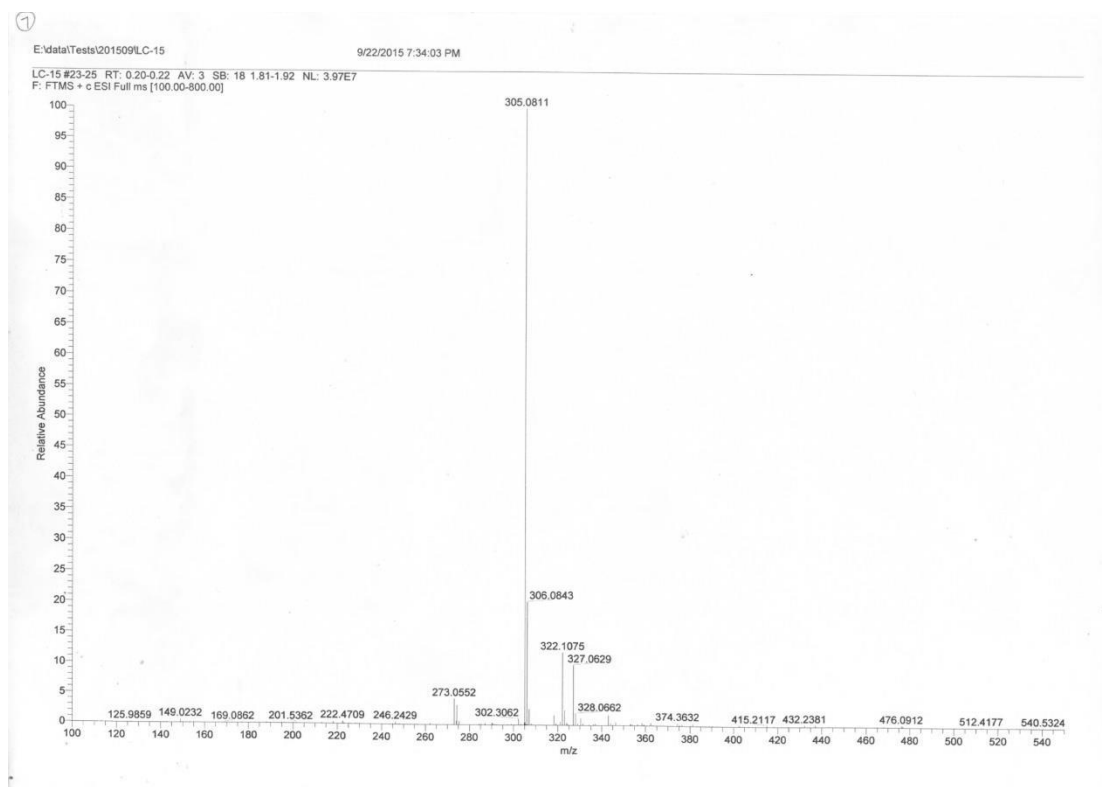

## S49. IR Spectrum of Compound 7

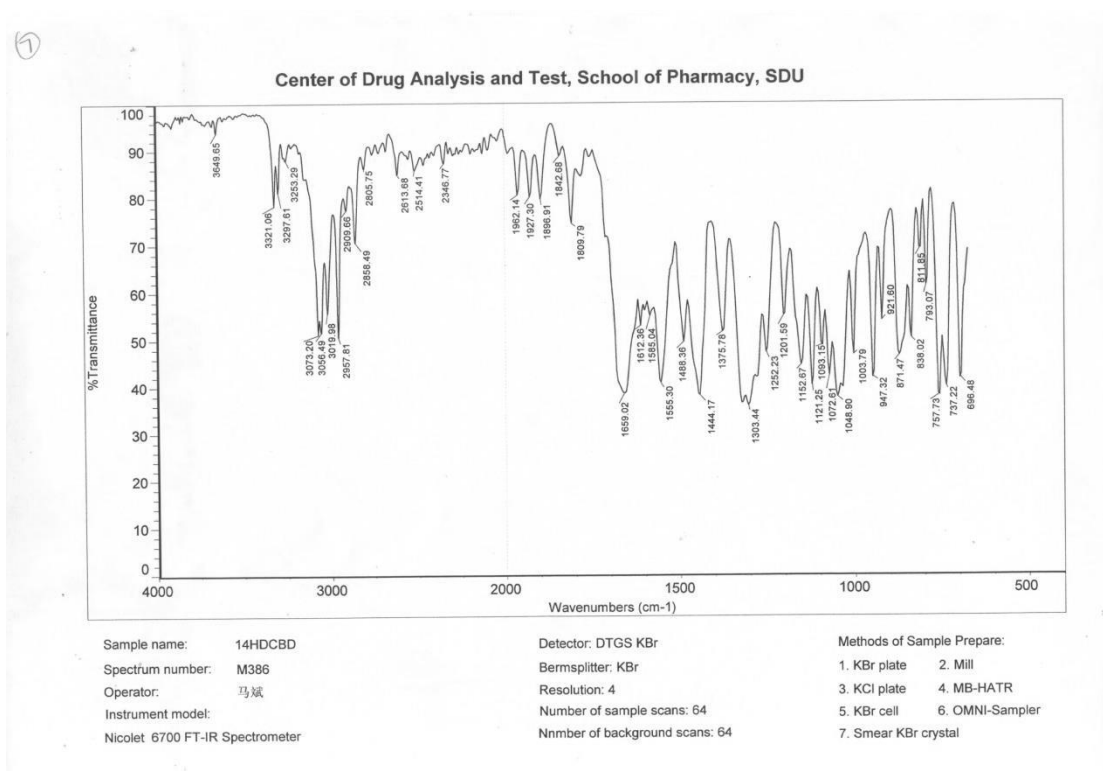

For compound 8:

## S50. <sup>1</sup>H NMR spectrum (600 MHz) of 8 in CD<sub>3</sub>OD

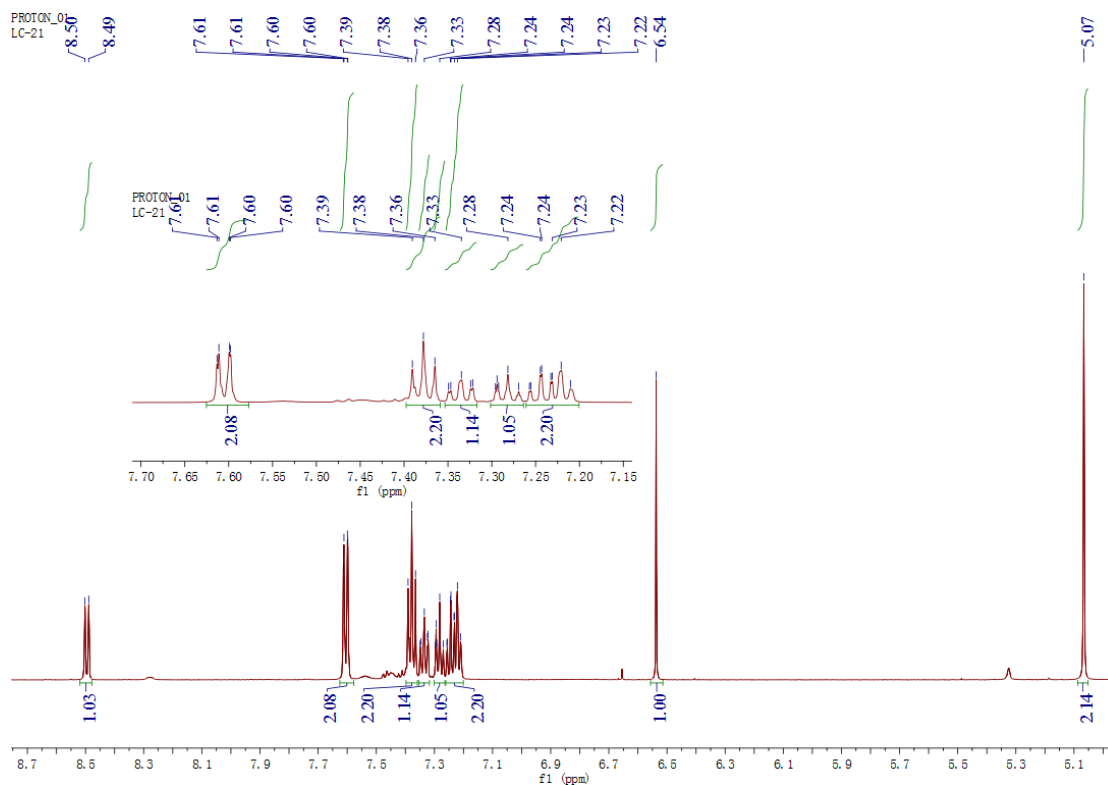

**S51.  $^{13}\text{C}$  NMR spectrum (150 MHz) of 8 in  $\text{CD}_3\text{OD}$**

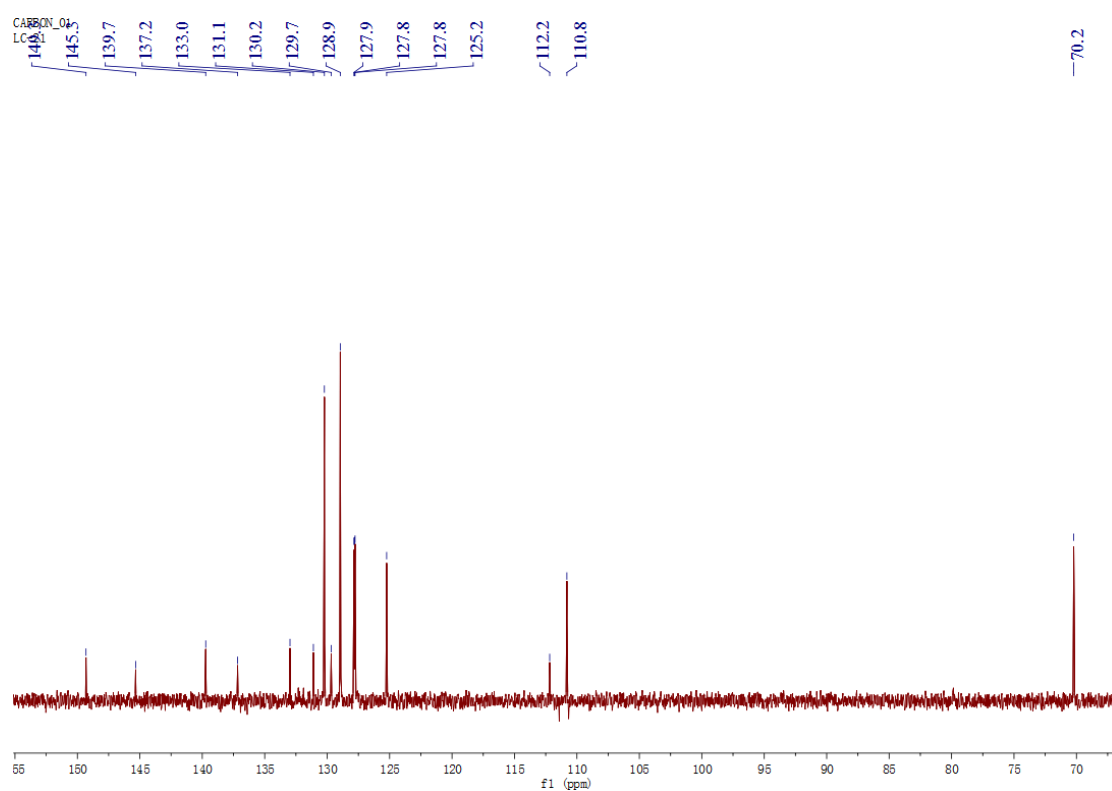

**S52.  $^1\text{H}$ - $^1\text{H}$  COSY spectrum of 8 in  $\text{CD}_3\text{OD}$**

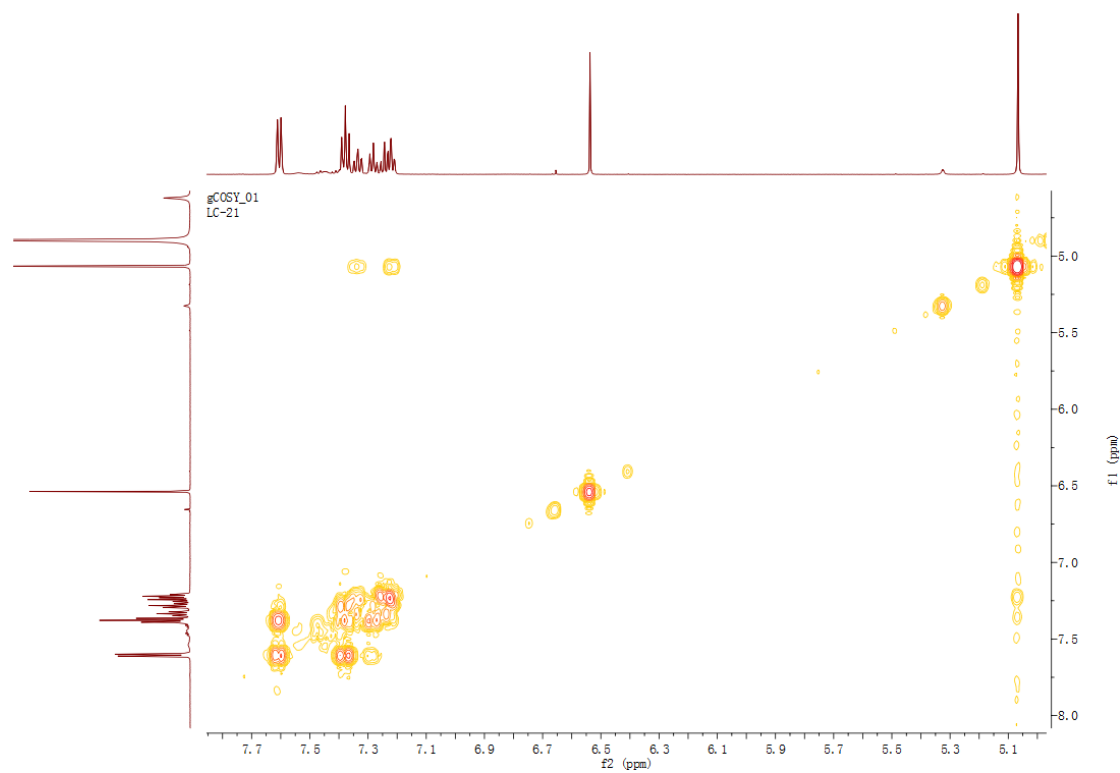

### S53. HSQC spectrum of 8 in CD<sub>3</sub>OD

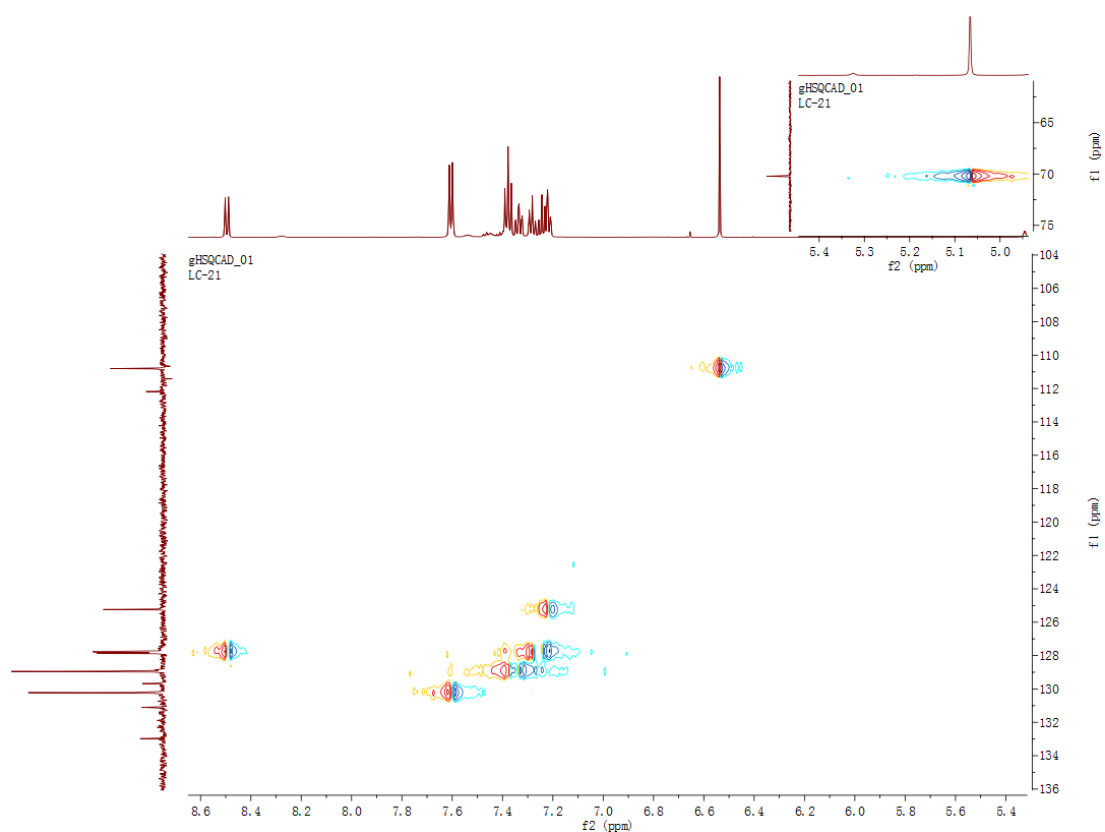

### S54. HMBC spectrum of 8 in CD<sub>3</sub>OD

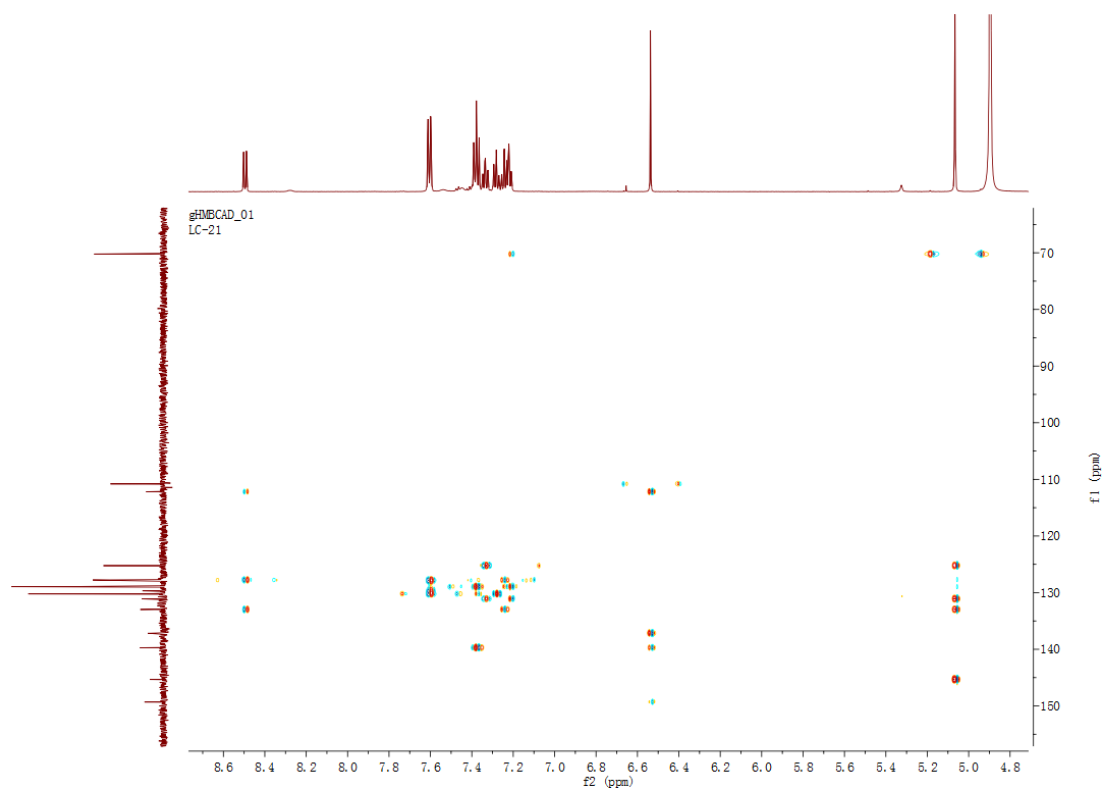

## S55. HRESIMS Spectrum of Compound 8

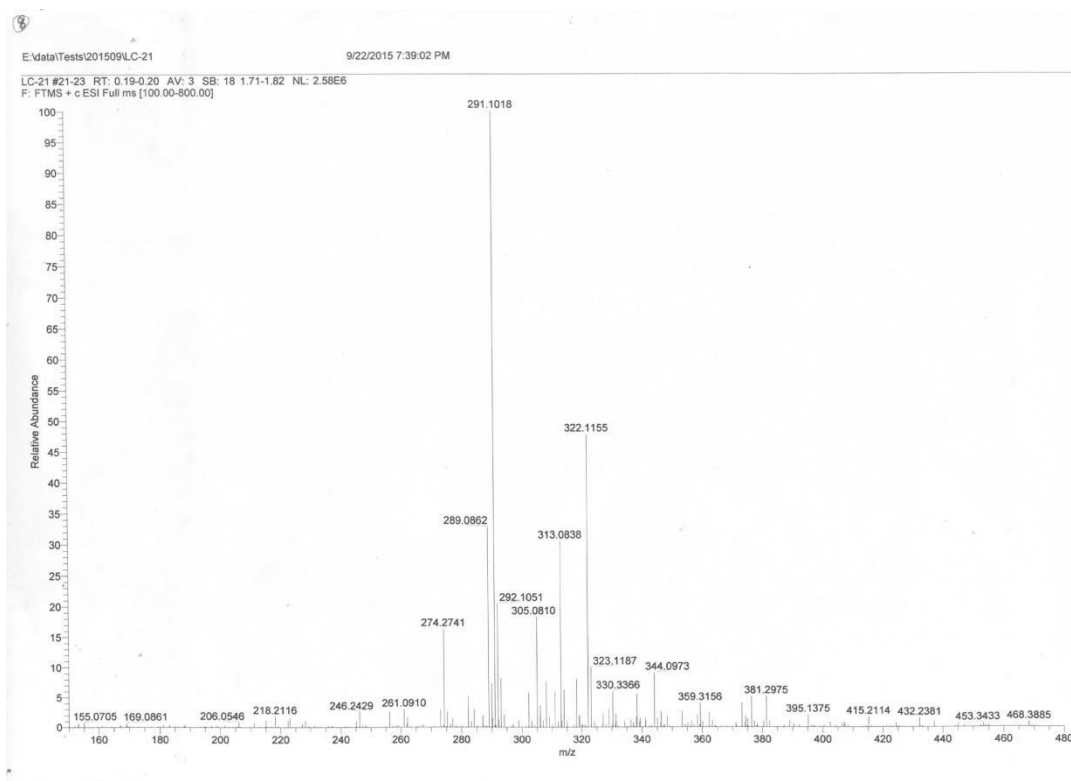

## S56. IR Spectrum of Compound 8

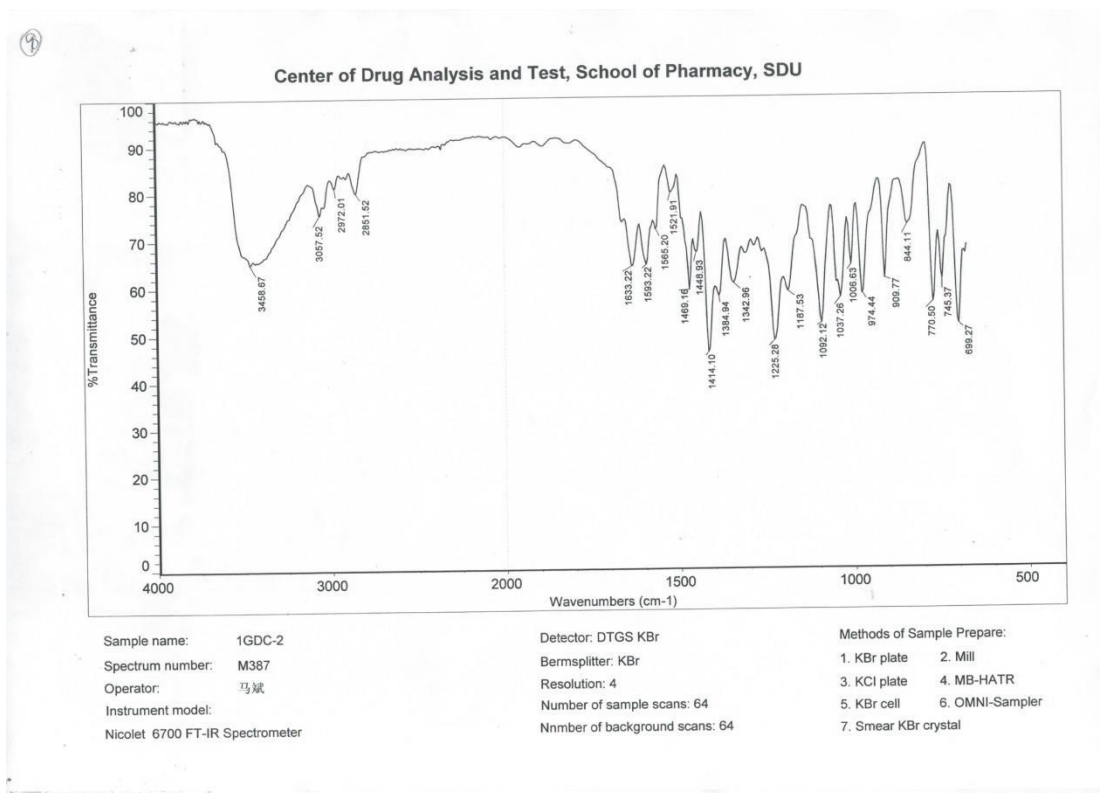



For compound 9:

S57.  $^1\text{H}$  NMR spectrum (400 MHz) of 9 in acetone- $d_6$

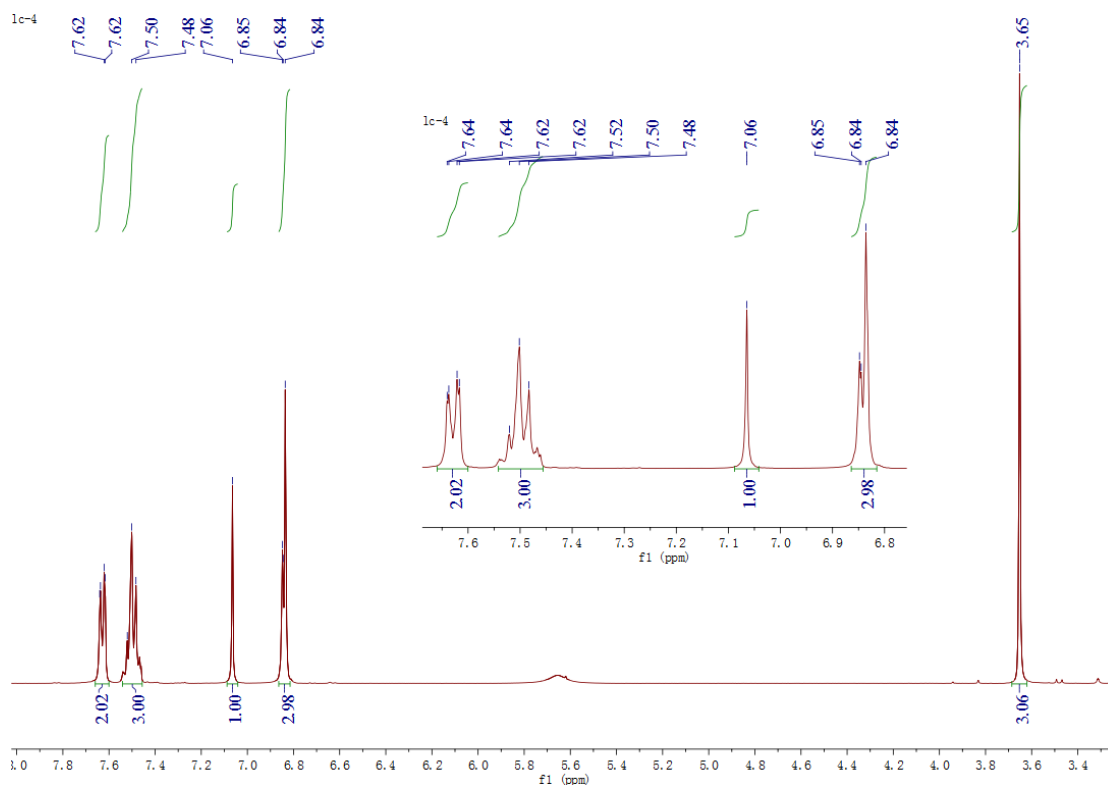

S58.  $^{13}\text{C}$  NMR spectrum (100 MHz) of 9 in acetone- $d_6$

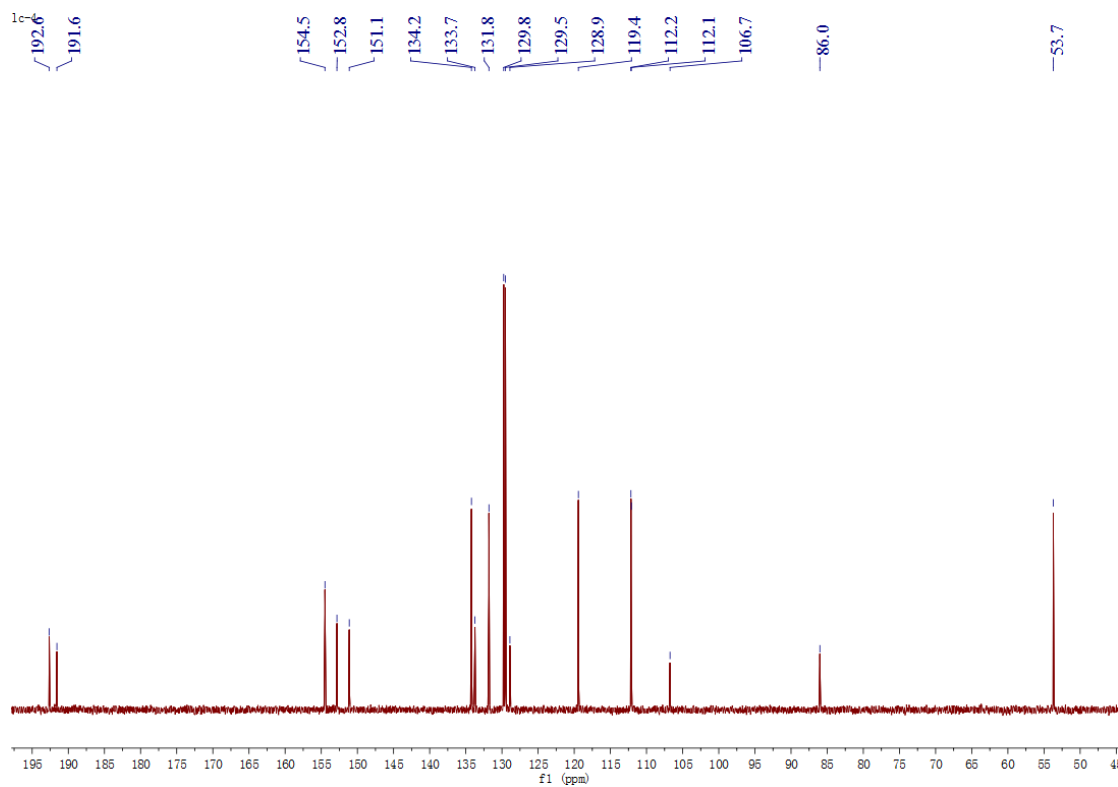

**S59.  $^1\text{H}$ - $^1\text{H}$  COSY spectrum of 9 in acetone- $d_6$**

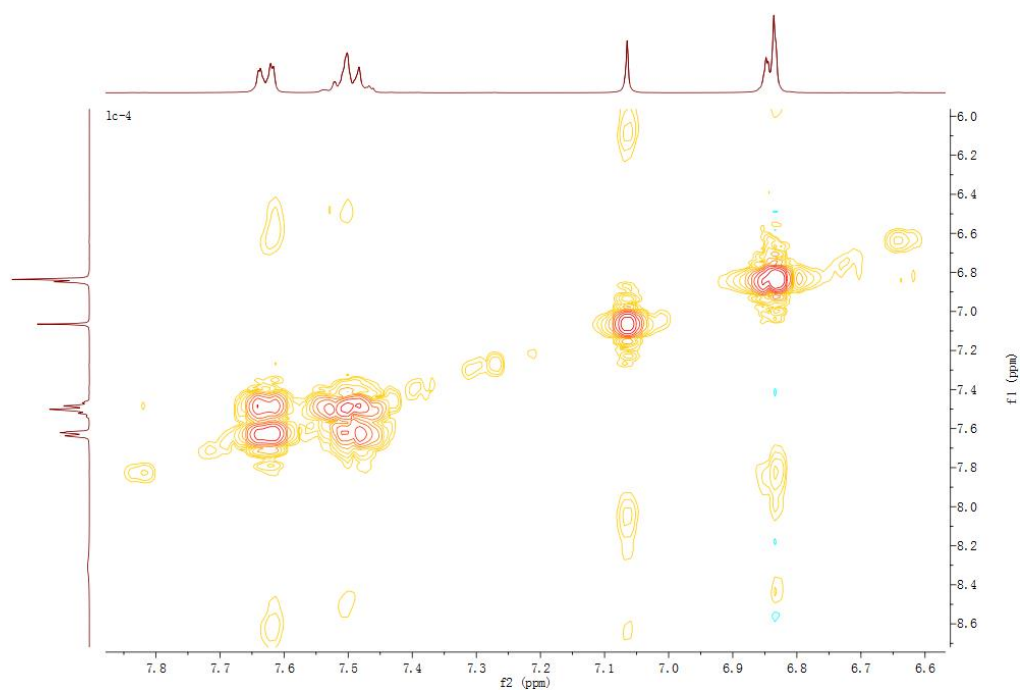

**S60. HSQC spectrum of 9 in acetone- $d_6$**

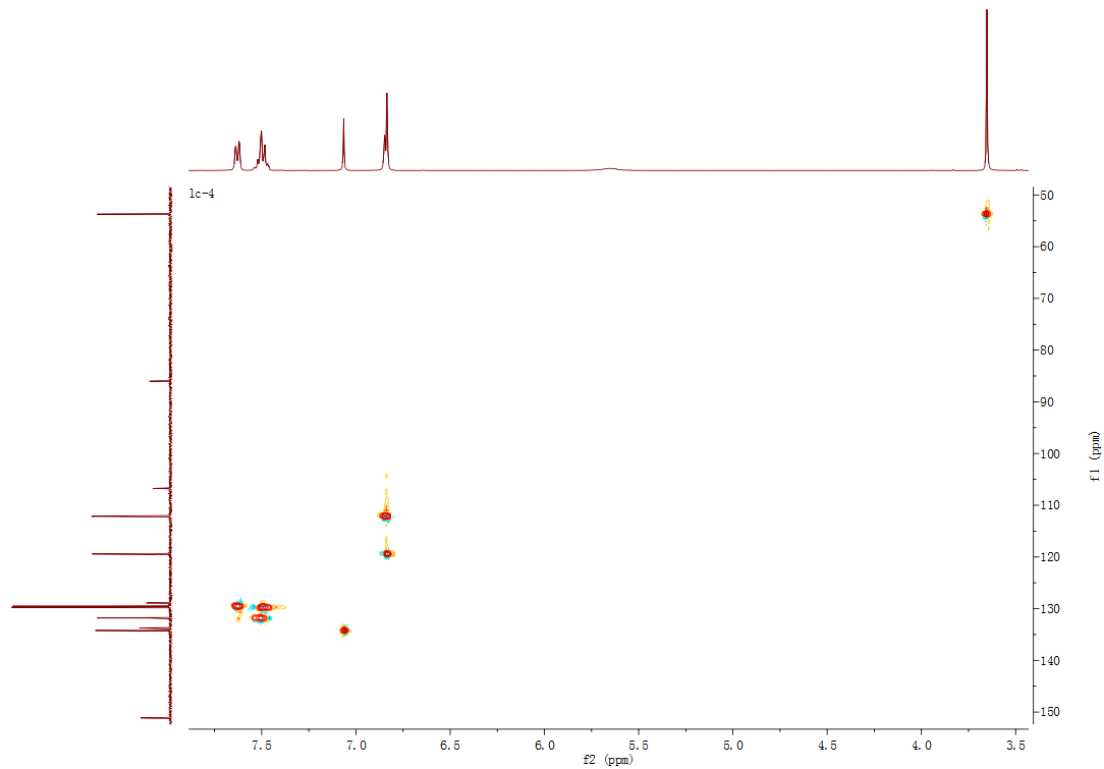

### S61. HMBC spectrum of 9 in acetone- $d_6$

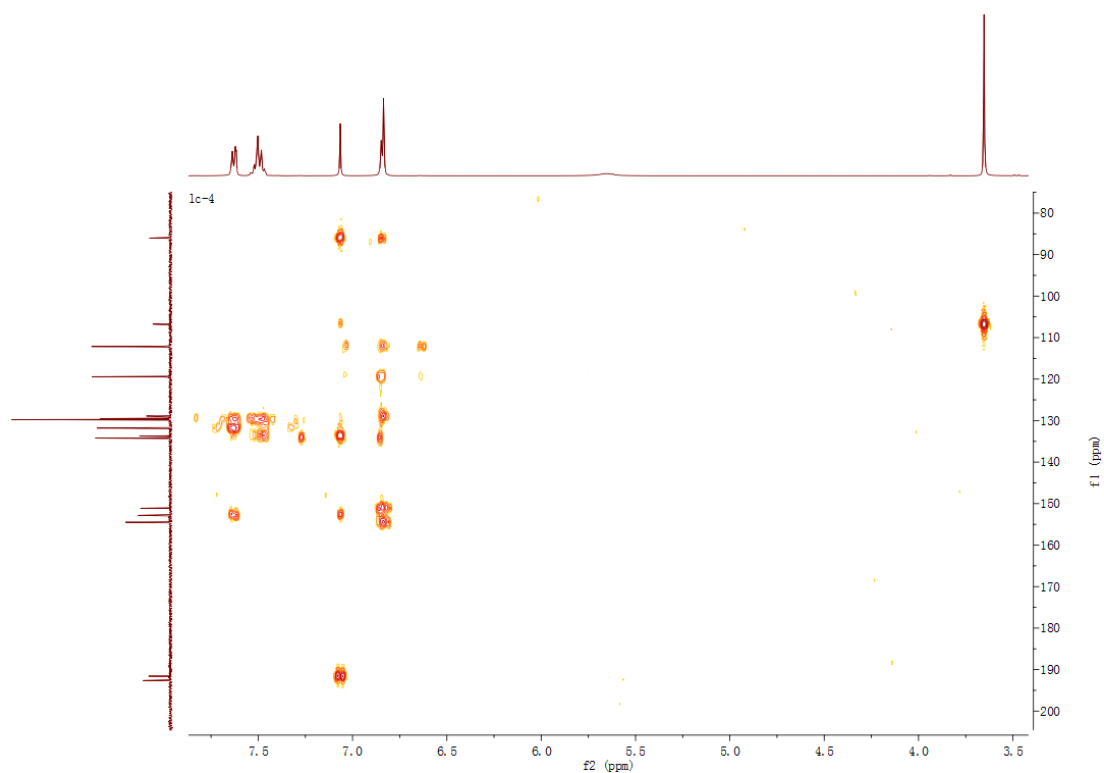

### S62. HRESIMS Spectrum of Compound 9

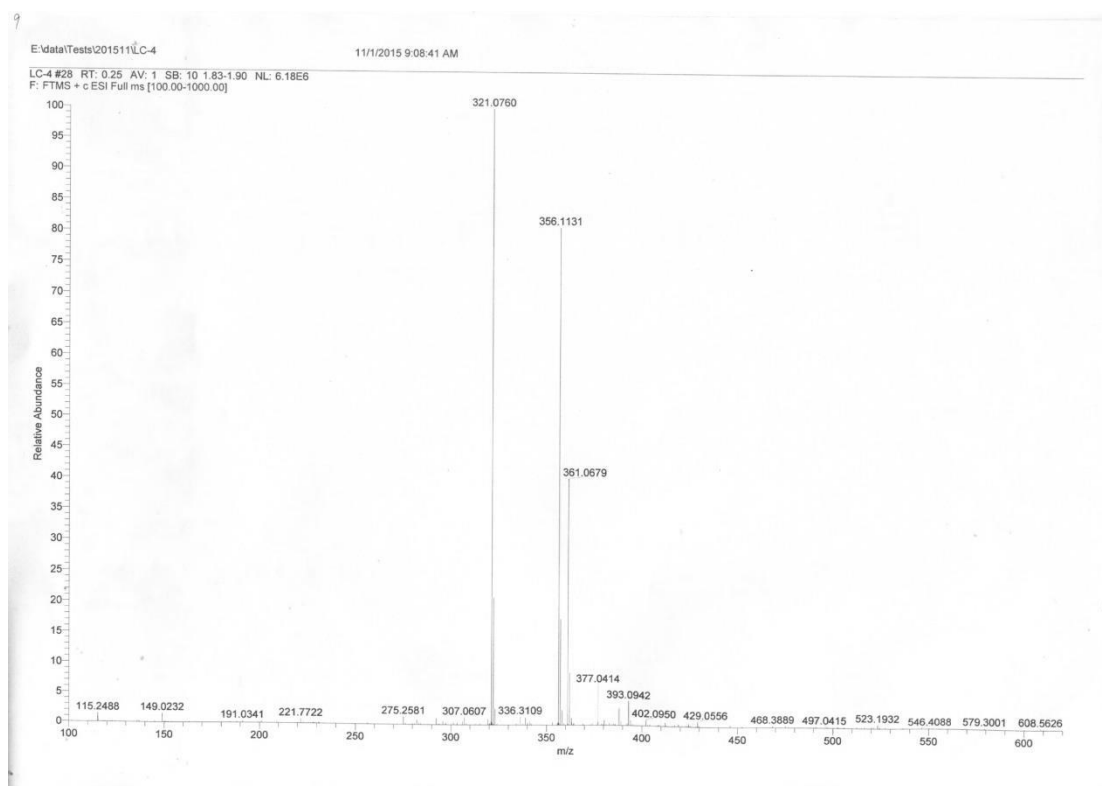

### S63. IR Spectrum of Compound 9

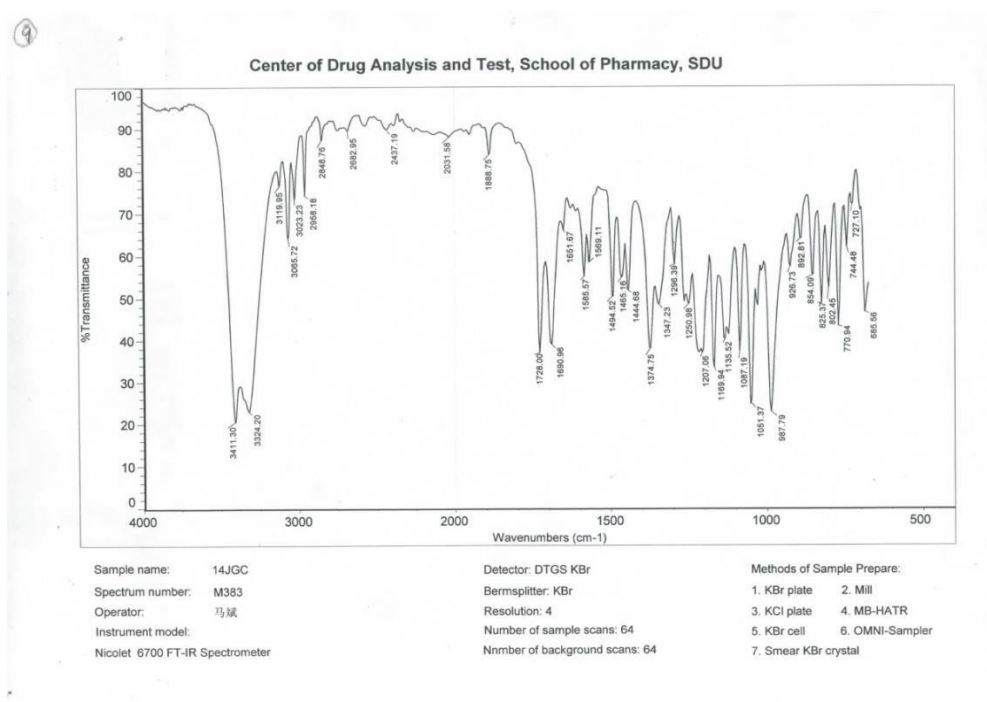

### S64. Chromatogram of 9 using chiral HPLC-CD spectroscopy

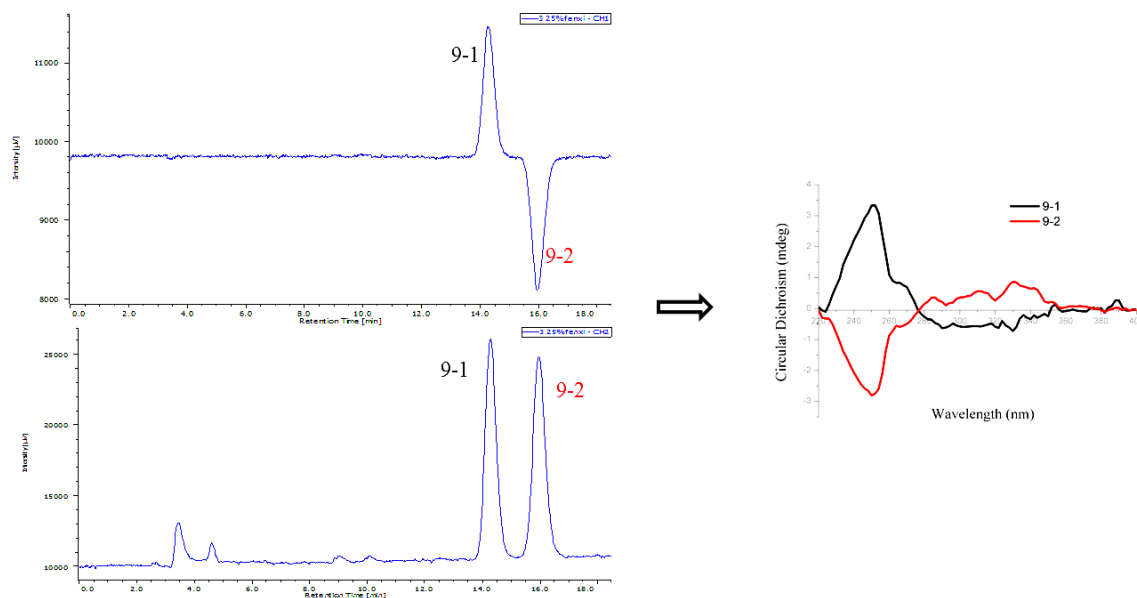

The HPLC separation chromatogram of 9 on chiral AD-H column (5  $\mu$ m, 250 x 4.6 mm, i.d.). Flow rate: 1.0 mL/min; solvent: iPrOH–n-hexane (1:3); detector wavelength: 232 nm

### S65. UV Spectrum of Compound 9a and 9b

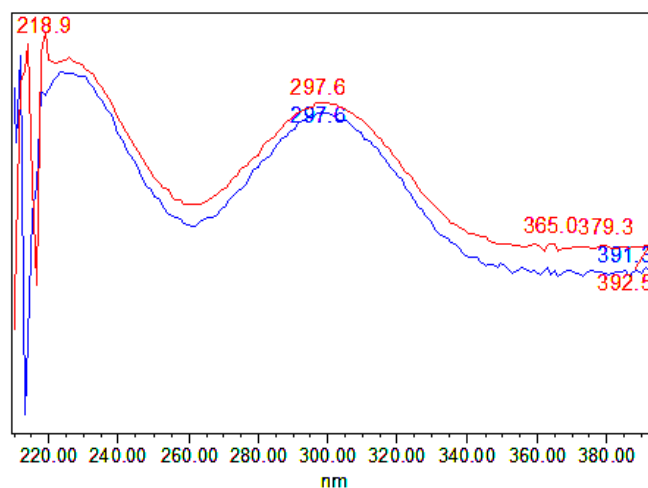

For compound 10:

### S66. $^1\text{H}$ NMR spectrum (600 MHz) of 10 in acetone- $d_6$

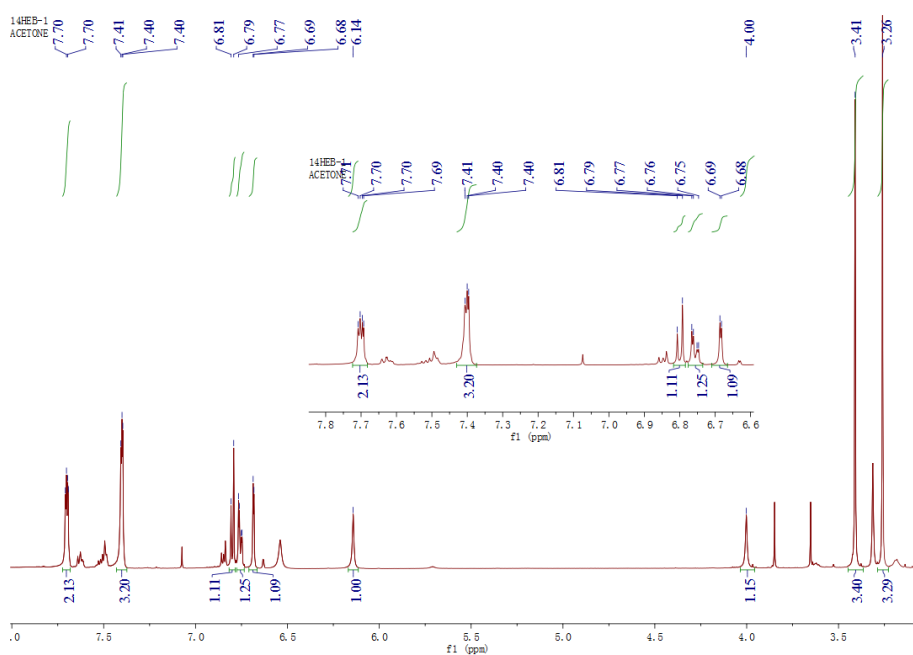

**S67.  $^{13}\text{C}$  NMR spectrum (150 MHz) of 10 in acetone- $d_6$**

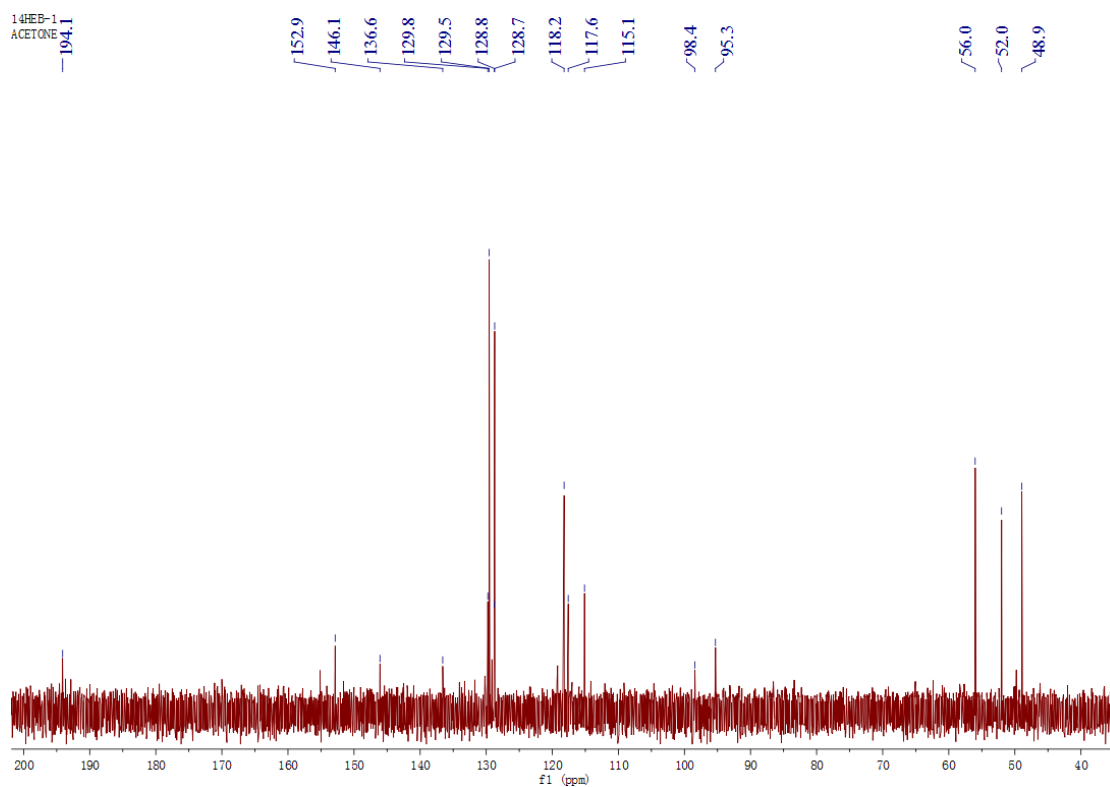

**S68.  $^1\text{H}$ - $^1\text{H}$  COSY spectrum of 10 in acetone- $d_6$**

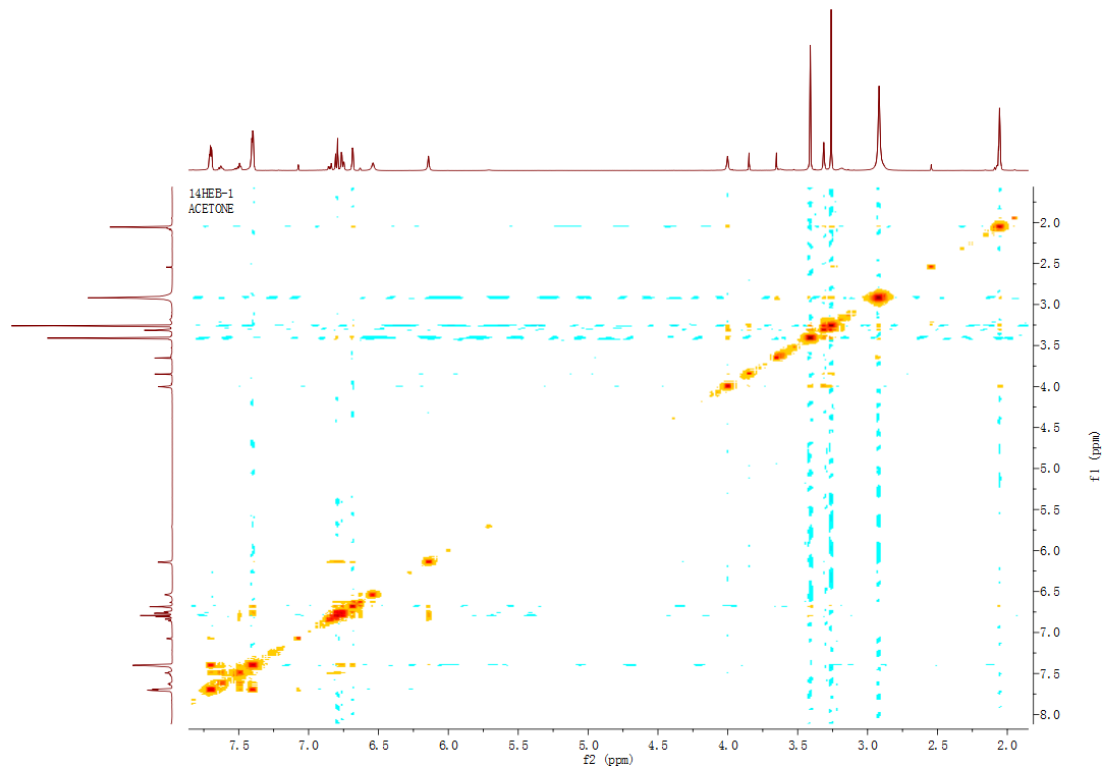

**S69. HSQC spectrum of 10 in acetone- $d_6$**

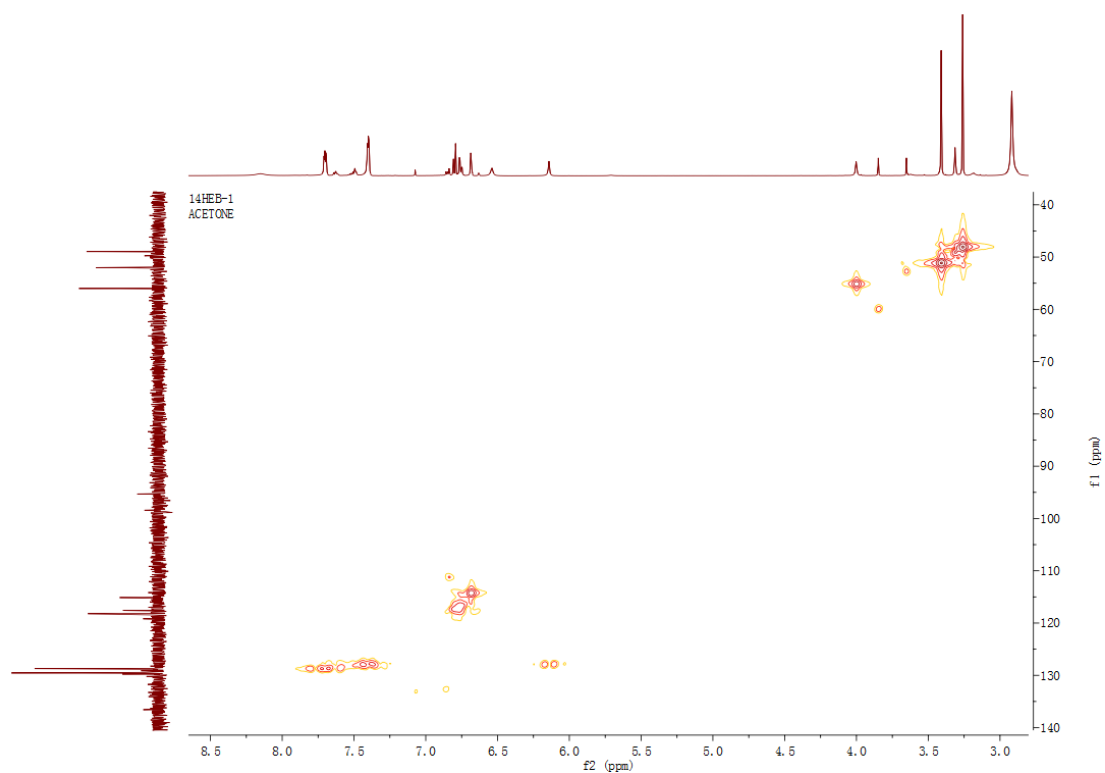

**S70. HMBC spectrum of 10 in acetone- $d_6$**

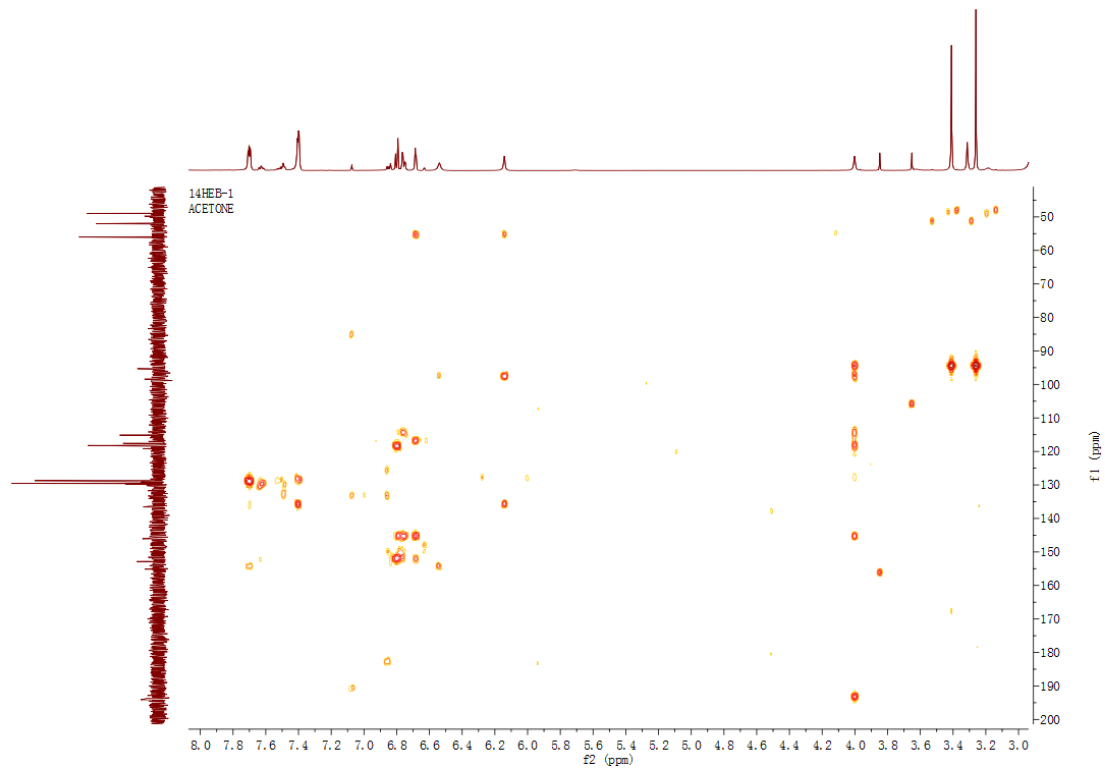

## S71. HRESIMS Spectrum of Compound 10

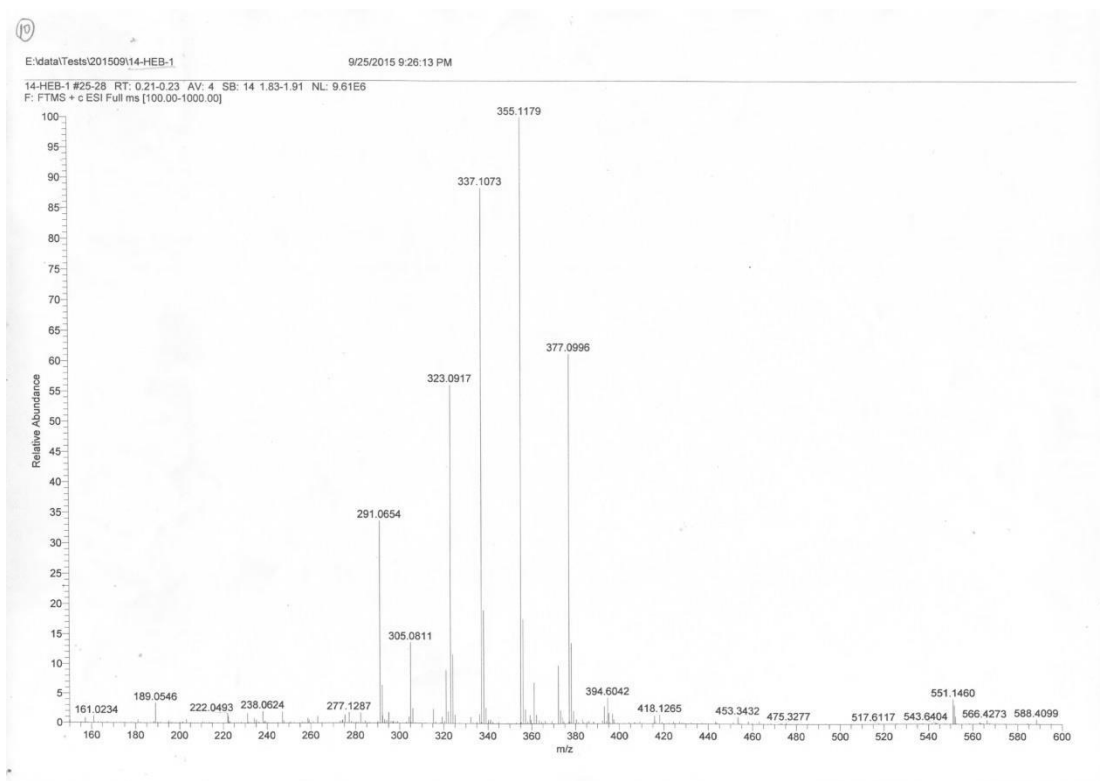

## S72. IR Spectrum of Compound 10

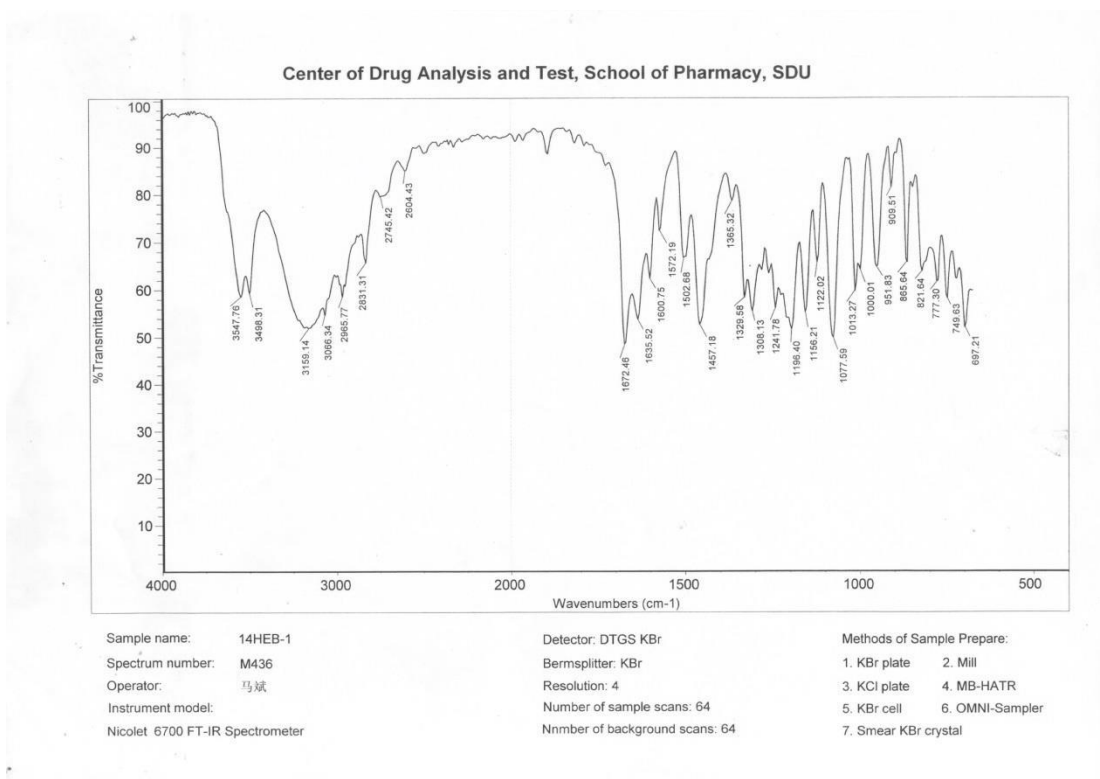



### S73. HPLC separation chromatogram of 10 on chiral column

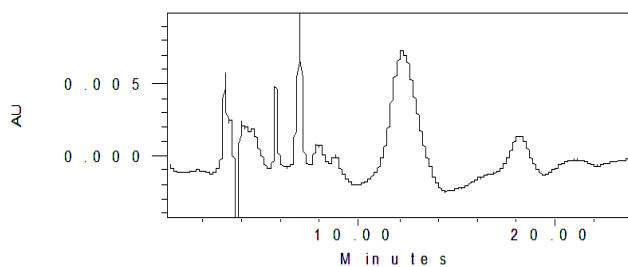

The HPLC separation chromatogram of 10 on chiral AD-H column (5  $\mu$ m, 250 x 10 mm, i.d.). Flow rate: 1.0 mL/min; solvent: iPrOH–n-hexane (1:1); detector wavelength: 220 nm

### S74. UV Spectrum of Compound 10a and 10b

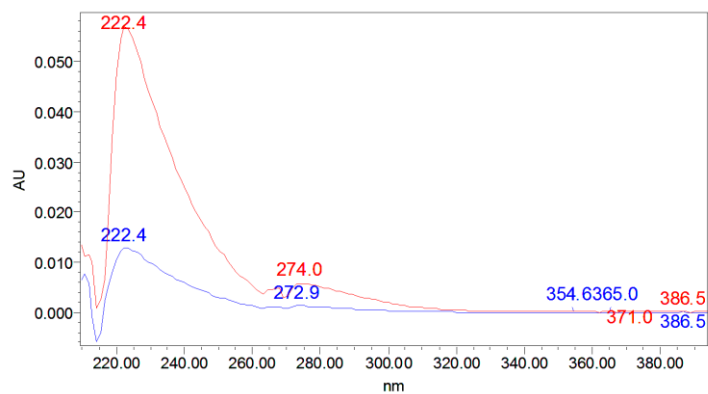

Supplement: Supplementary file 1 [file 5851797]
